# Supplementary material for: Mitoregulin: A lncRNA-Encoded Microprotein that Supports Mitochondrial Supercomplexes and Respiratory Efficiency
Source: PubMed Central journal article supplement — Cell Rep. Author manuscript; Available in PMC 2018 Aug 14. (PMC6091870; doi:10.1016/j.celrep.2018.06.002), 2018-06-26
Supplement: NIHMS1500496-supplement-1.pdf [file NIHMS1500496-supplement-1.pdf]

**Cell Reports, Volume 23**

**Supplemental Information**

**Mitoregulin: A lncRNA-Encoded**

**Microprotein that Supports Mitochondrial**

**Supercomplexes and Respiratory Efficiency**

**Colleen S. Stein, Pooja Jadiya, Xiaoming Zhang, Jared M. McLendon, Gabrielle M. Abouassaly, Nathan H. Witmer, Ethan J. Anderson, John W. Elrod, and Ryan L. Boudreau**

## SUPPLEMENTAL INFORMATION

### Mitregulin: a lncRNA-encoded microprotein that supports mitochondrial supercomplexes and respiratory efficiency

Colleen S. Stein, Pooja Jadiya, Xiaoming Zhang, Jared M. McLendon, Gabrielle M. Abouassaly, Nathan H. Witmer, Ethan J. Anderson, John W. Elrod, and Ryan L. Boudreau\*

Supplemental information inventory:

|                  |                                                                                                                                             |
|------------------|---------------------------------------------------------------------------------------------------------------------------------------------|
| <b>Figure S1</b> | Generation of LINC00116 (NC116) homolog (1500011K16Rik) knockout mice. Related to Figure 2 and Figure 5.                                    |
| <b>Figure S2</b> | Intracellular localization of FLAG-tagged Mtn proteins. Related to Figure 2.                                                                |
| <b>Figure S3</b> | Metabolic phenotyping data from HeLa cells overexpressing Mtn. Related to Figure 3.                                                         |
| <b>Figure S4</b> | Mitochondrial DNA and cardiolipin content in Mtn-overexpressing HeLa cells and Mtn-KO mouse muscle tissues. Related to Figures 2-5.         |
| <b>Figure S5</b> | Exercise tolerance testing and myofiber respiration measures in wild-type and Mtn-KO mice. Related to Figure 5.                             |
| <b>Figure S6</b> | Evaluation of oxidative stress readouts in wild-type and Mtn-KO mouse muscle tissues. Related to Figure 5.                                  |
| <b>Figure S7</b> | Respiratory chain complex levels and Mtn distribution in wild-type and Mtn-KO mouse heart and skeletal muscle tissues. Related to Figure 5. |
| <b>Figure S8</b> | Complex I in-gel activity assay on wild-type and Mtn-KO muscle tissues. Related to Figure 5.                                                |
| <b>Figure S9</b> | Expression of TCA and FAO pathway enzymes in wild-type and Mtn-KO mouse hearts. Related to Figure 5.                                        |
| <b>Table S1</b>  | Top genes co-expressed with human <i>LINC00116</i> and mouse <i>15000iiK16Rik</i> . Related to Figure 1.                                    |
| <b>Table S2</b>  | Gene ontology enrichment analysis on overlapping human and mouse LINC00116 co-expressed genes Related to Figure 1.                          |
| <b>Table S3</b>  | Summary and annotation of shared human and mouse <i>LINC00116</i> co-expressed genes. Related to Figure 1.                                  |
| <b>Table S4</b>  | DNA and siRNA oligonucleotide sequences                                                                                                     |

Figure S1

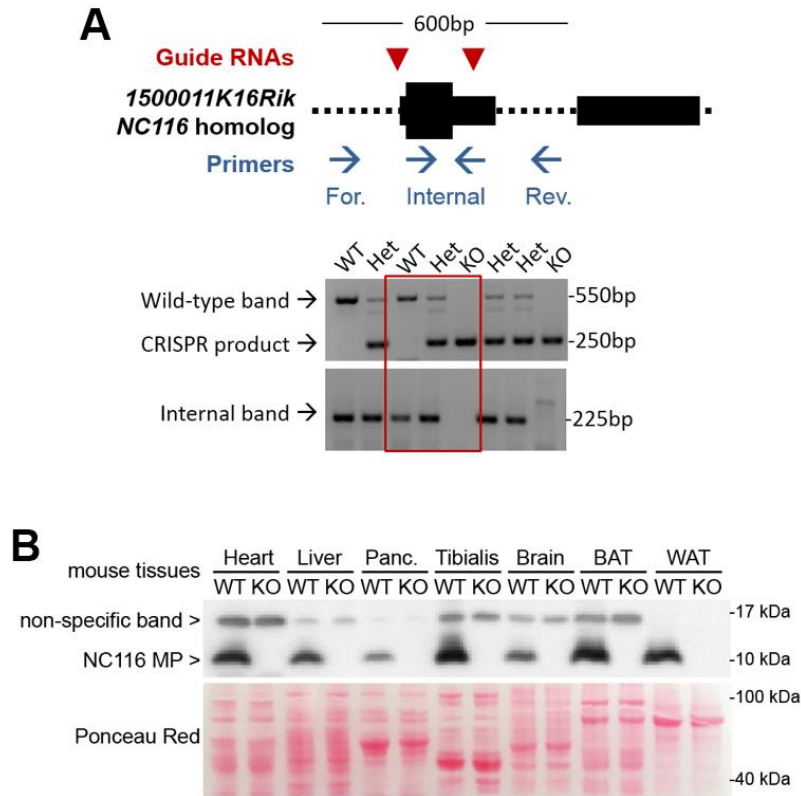

**Figure S1. Generation of *LINC00116* (*NC116*) homolog (*1500011K16Rik*) knockout mice. Related to Figure 2 and Figure 5. (A)** CRISPR/Cas9 technology was employed to delete the *NC116* homolog from mouse genome using guide RNAs flanking the sORF. Genotyping primers to detect the deletion are shown in the schematic overview, and a gel image is provided to show example PCR results. **(B)** Western blot analysis on mouse tissue panels revealed a prominent 10 kDa band enriched in muscle and heart tissues that was not present in *NC116*-MP knockout mouse tissues. Non-specific bands and Ponceau Red serve as loading controls.

**Figure S2**

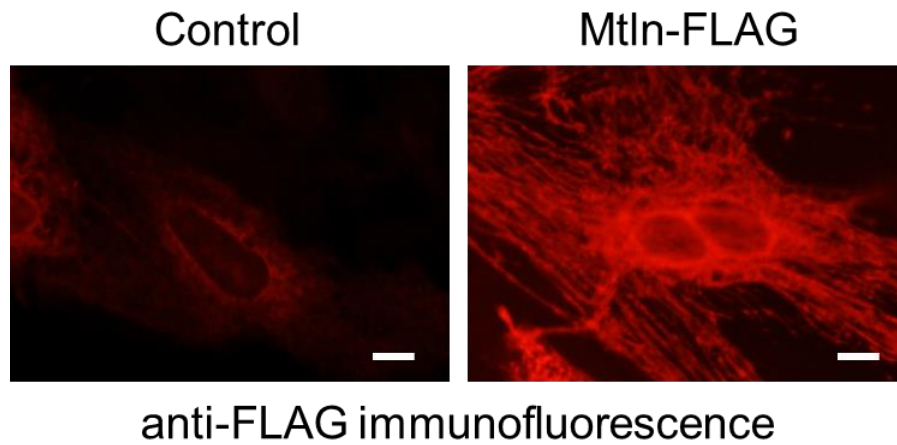

**Figure S2. Intracellular localization of FLAG-tagged Mtn proteins. Related to Figure 2.** C-terminal FLAG-tagged Mtn expression plasmids were transfected into cultured neonatal cardiomyocytes and immunocytochemistry was performed using an anti-FLAG antibody. Mtn-FLAG staining shows patterning consistent with mitochondrial localization; non-transfected cells serve as control. Scale bar = 10  $\mu$ m.

**Figure S3**

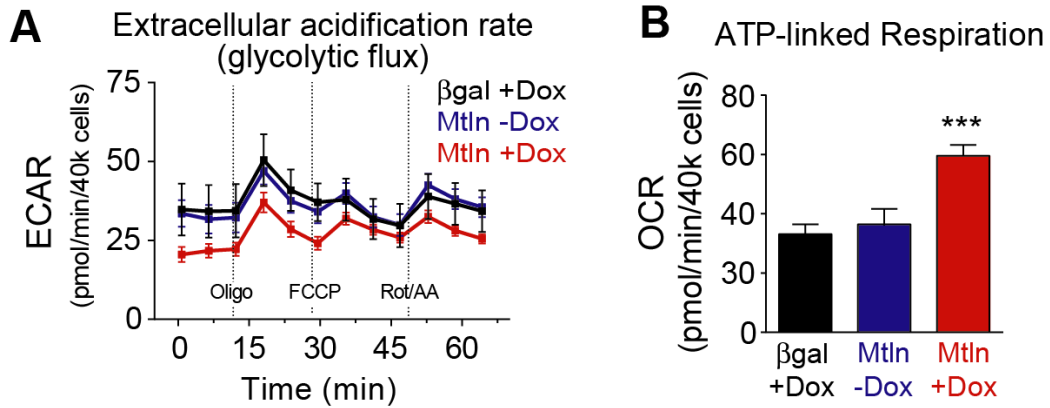

**Figure S3. Metabolic phenotyping data from HeLa cells overexpressing Mtn. Related to Figure 3.** Doxycycline (DOX)-inducible expression vectors were used to overexpress Mtn and beta-galactosidase ( $\beta$ gal, control) in cultured human HeLa cells, and 48 h later, Seahorse assays were performed in treated cells, measuring oxygen consumption (see **Figure 3C**) and extracellular acidification rates (**A**). (**B**) For oxygen consumption studies, ATP-linked respiration was calculated and plotted. Graphs are plotted as mean  $\pm$  SEM ( $n=12$ ) is indicated within each bar, and p-values were determined by one-way ANOVA with Dunnett's post-hoc, comparing to  $\beta$ gal+Dox; \*\*\* $p<0.001$ .

Figure S4

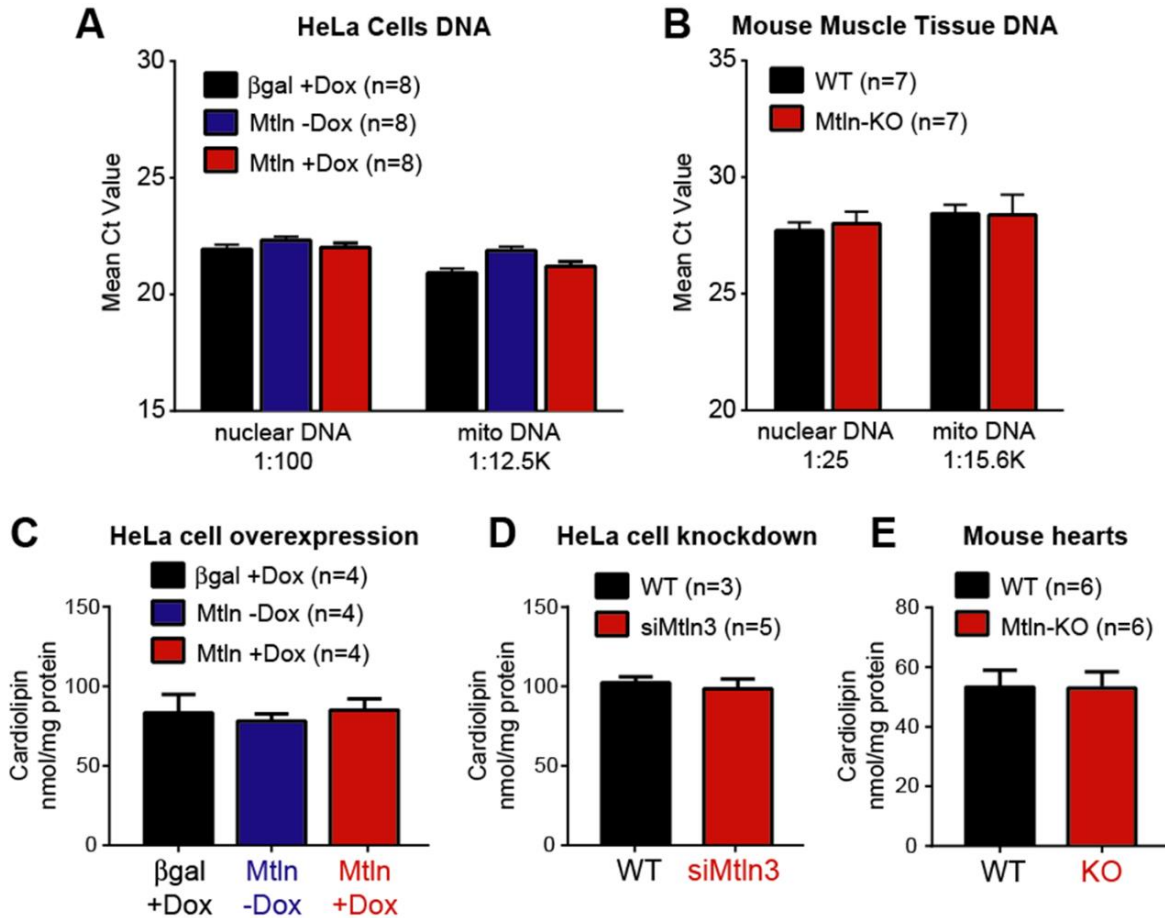

**Figure S4. Mitochondrial DNA and cardiolipin content in MtlN-overexpressing HeLa cells and MtlN-KO mouse muscle tissues. Related to Figures 2-5.** (A) Doxycycline (DOX)-inducible expression vectors were used to overexpress MtlN and beta-galactosidase (βgal, control) in cultured human HeLa cells, and 48 h later, DNA was extracted and mitochondrial and nuclear genomes quantified using qPCR (DNA dilutions indicated). (B) *In vivo* assessment of mitochondrial and nuclear DNA levels was also performed using mouse skeletal muscle DNA samples. (C-E) Cardiolipin levels were measured in Dox-inducible MtlN overexpression HeLa cells (C), in HeLa cells with siRNA-mediated MtlN knockdown (D), and in wild-type (WT) and MtlN-KO mouse hearts (E). Graphs are plotted as mean Ct  $\pm$  SEM (sample *n* is indicated). One-way ANOVA with Dunnett's post-hoc, comparing to βgal+Dox (overexpression studies), and two-tailed t-tests (WT vs. knockdown or KO) revealed no significant differences in mitochondrial DNA levels (with or without normalization to nuclear DNA; latter not shown) nor cardiolipin levels in MtlN-overexpressing cells or MtlN-KO tissues.

**Figure S5**

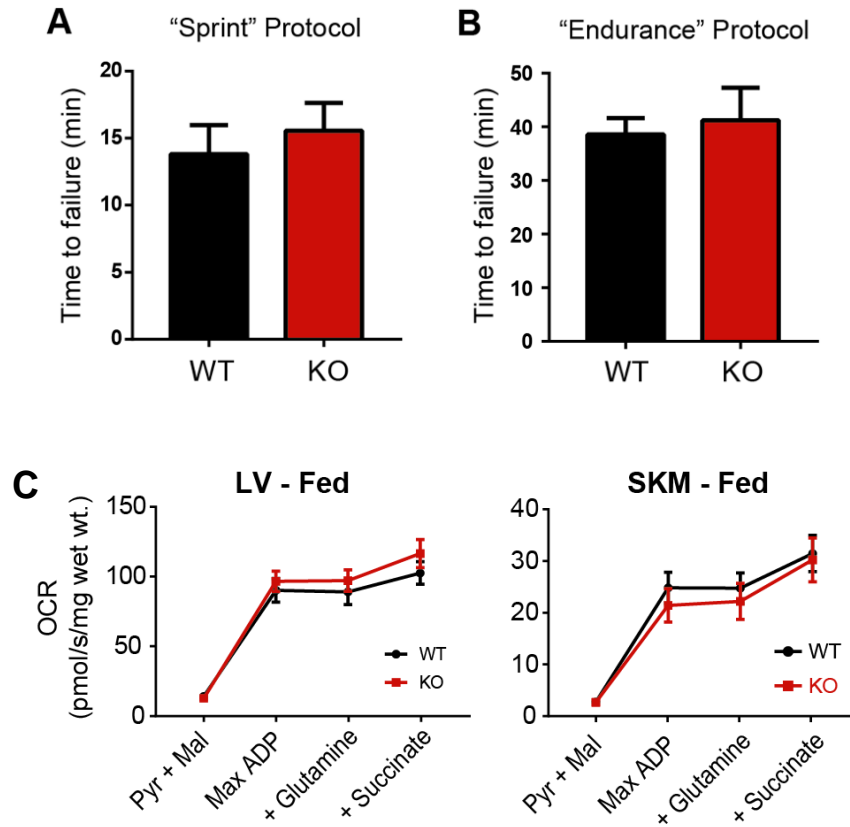

**Figure S5. Exercise tolerance testing and myofiber respiration measures in wild-type and Mtn-KO mice. Related to Figure 5.** Mice were subjected to exercise tolerance testing using either “sprint” (A) or gradual accelerated “endurance” (B) paradigms (see STAR Methods). Time to failure (i.e. no longer able to remain running on the treadmill) is plotted as mean  $\pm$  SEM;  $n=10$  per genotype (5 males and 5 females for each). No significant genotype-based differences were observed; two-tailed student’s t-test. (C) Permeabilized muscle fibers [cardiac, left ventricular (LV) and skeletal muscle (SKM), gastrocnemius] were harvested from fed wild-type (WT) or Mtn-KO mice, and oxygen consumption rates (OCR) were measured during sequential addition of pyruvate + malate (Pyr + Mal), 1 mM ADP (Max ADP), glutamine, and succinate; data are plotted as mean  $\pm$  SEM. Fed: WT  $n=7$  (4 males, 3 females), KO  $n=7$  (3 males, 4 females); Fasted:  $n=4$  females for both WT and KO.

Figure S6

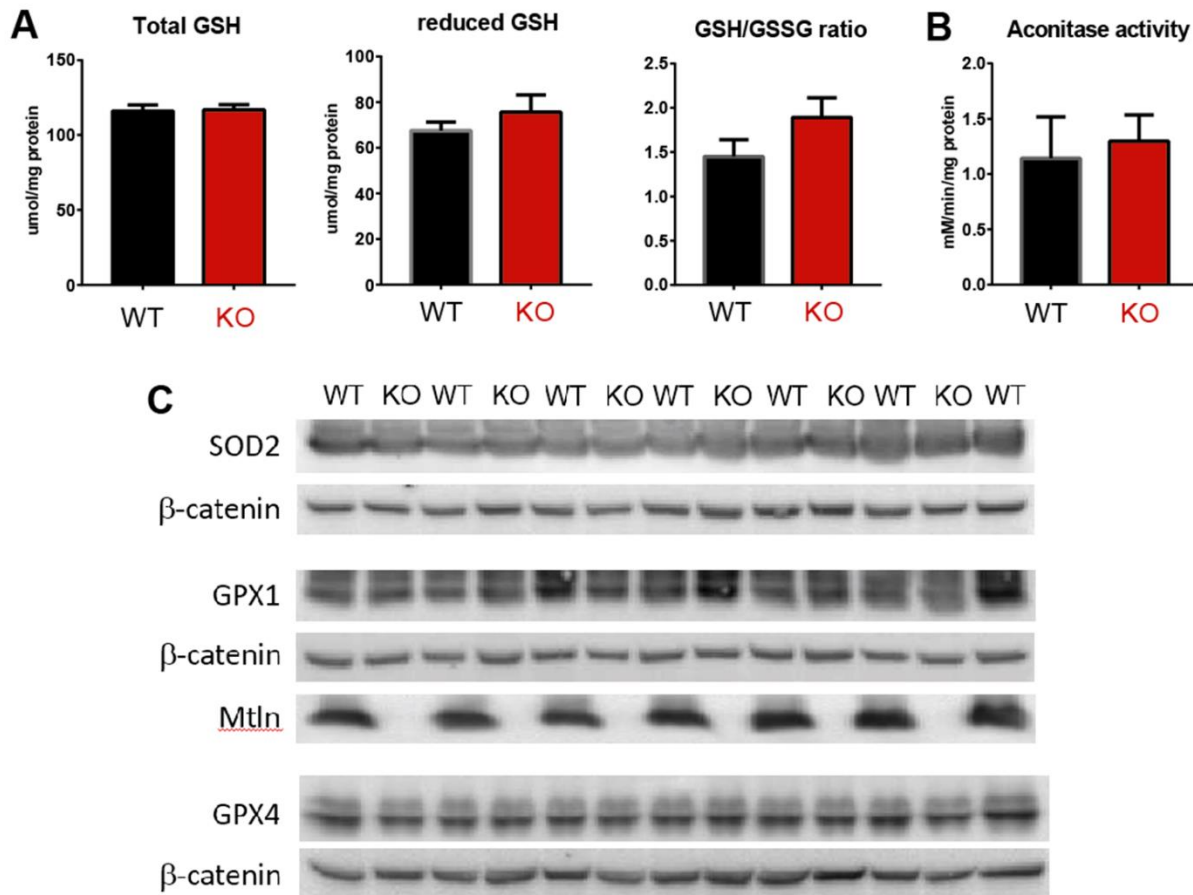

**Figure S6. Evaluation of oxidative stress readouts in wild-type and MtlN-KO mouse muscle tissues. Related to Figure 5.** (A) Levels of glutathione, both reduced (GSH) and oxidized (GSSG) forms, were measured in WT and KO mouse skeletal muscle tissue lysates. (B) Mitochondrial aconitase activity, which is known to be strongly suppressed by mitochondrial ROS, was measured in isolated mitochondria from WT and KO mouse hearts. Graphs are plotted as mean Ct +/-SEM (n=4 for each bar) Two-tailed t-tests revealed no significant differences between WT and MtlN-KO tissues. (C) Levels of key mitochondrial antioxidant enzymes (SOD2, GPX1 and GPX4) were measured in WT and KO cardiac tissues lysates, as an alternative readout for oxidative stress in the mice. No genotype-based differences were observed.



**Figure S7**

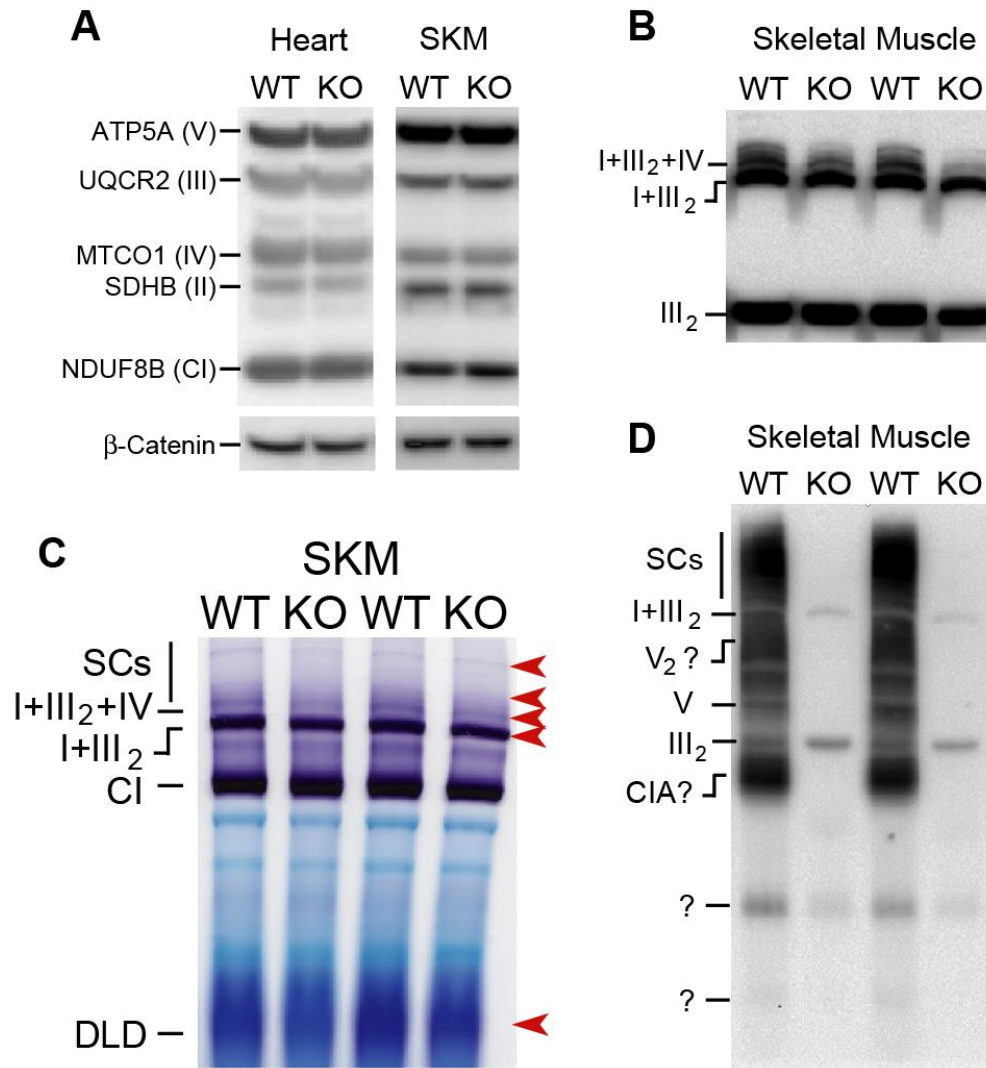

**Figure S7. Respiratory chain complex levels and Mtn distribution in wild-type and Mtn-KO mouse heart and skeletal muscle tissues. Related to Figure 5.** (A) Representative OXPHOS cocktail western blot performed on heart and skeletal muscle (SKM) tissues; n=4 per genotype were run, but no consistent genotype-based differences were observed. (B) Representative BN-PAGE and western blot for a Complex III subunit performed on SKM tissues. These data corroborate the reduced supercomplex formation observed in SKM by in-gel activity assay (panel C). (C) In-gel Complex I (CI) activity assay was performed on SKM tissue lysates from fed wild-type female mice (n=3/genotype, representative gels shown). Red arrows denote bands with decreased CI activity in KO mice. Upper red arrow points to a doublet band in WT hearts, with the top band virtually absent in KO mice. (D) Representative BN-PAGE western blot on SKM lysates shows co-migration of Mtn with various prominent mitochondrial complexes; see Figure 5D for cardiac tissue data.

Figure S8

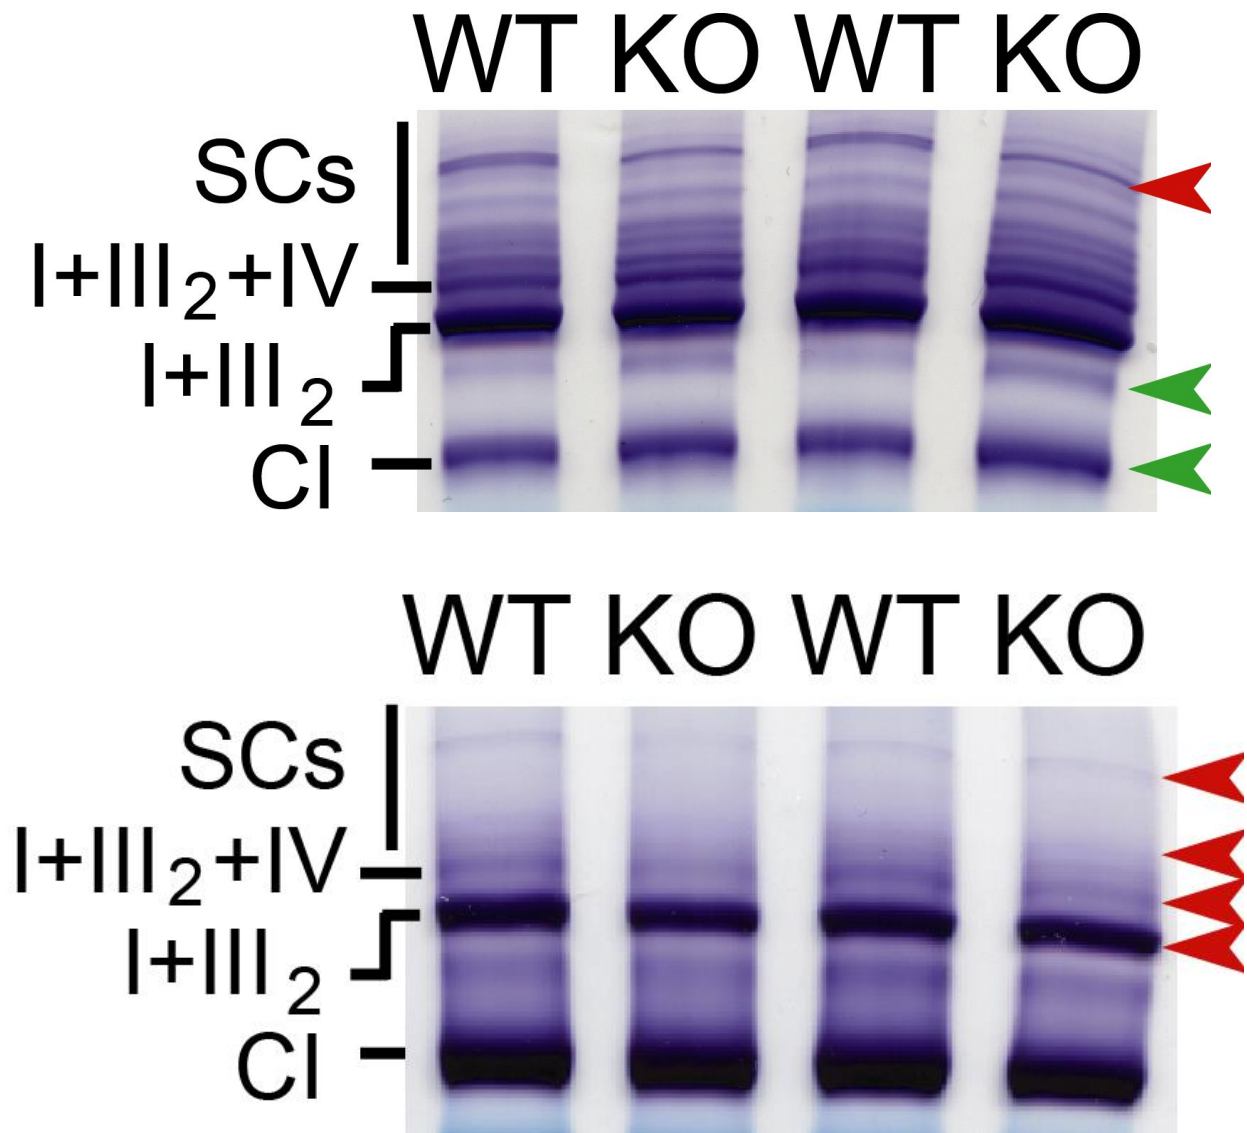

**Figure S8. Complex I in-gel activity assay on wild-type and Mtl<sup>n</sup>-KO muscle tissues. Related to Figure 5.** Higher-power images corresponding to the Complex I (CI) in-gel activity assay presented in [Figure 5C](#) (heart, top) and [Figure S7C](#) (SKM, bottom) are provided to allow better visualization of the bands that show changes in Mtl<sup>n</sup>-KO versus wild-type mice. Red and green arrows denote bands with decreased or increased (respectively) CI activity in KO mice. Upper red arrow points to a clear doublet band in WT hearts, with the top band being virtually absent in KO mice.

**Figure S9**

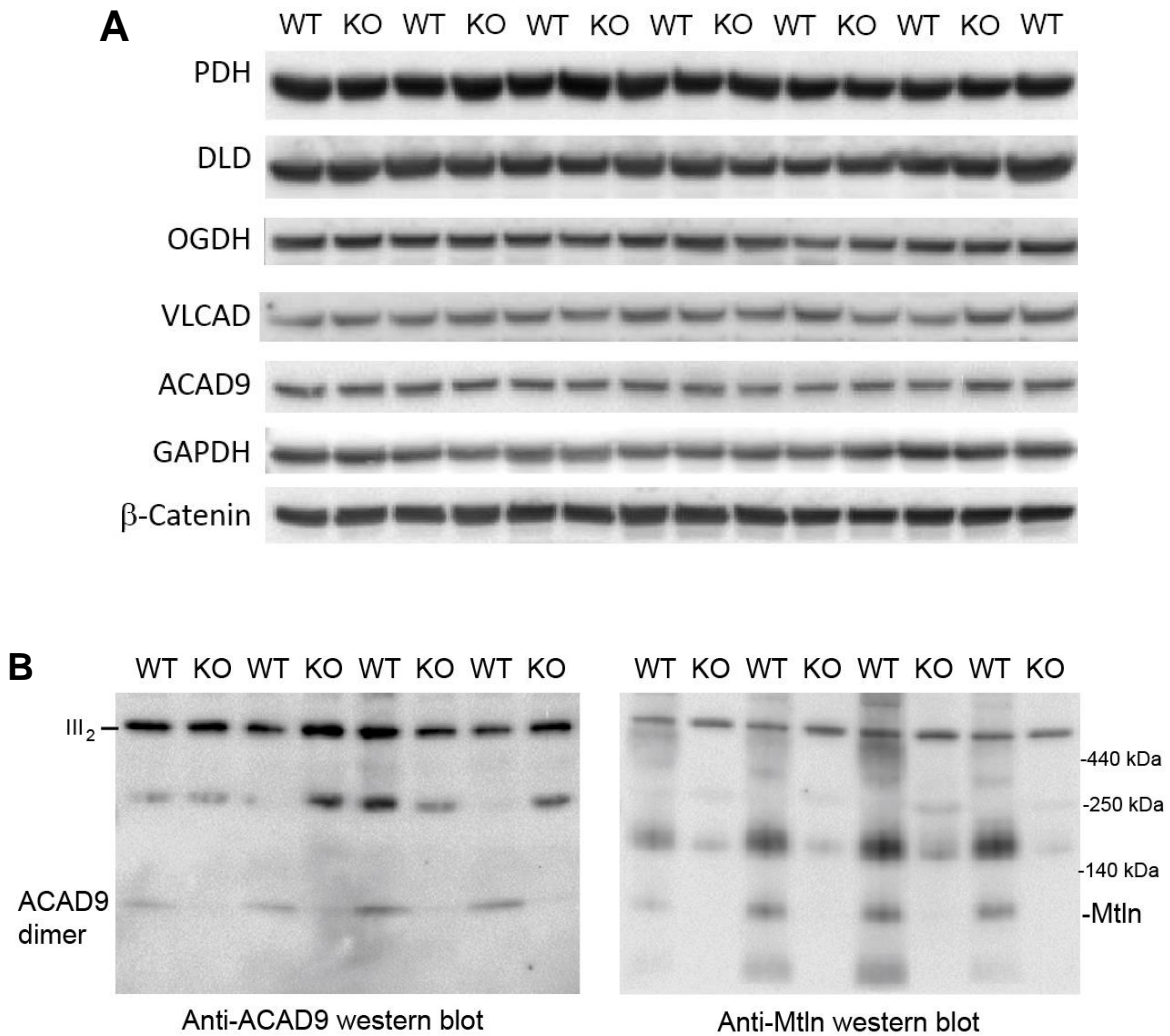

**Figure S9. Expression of TCA and FAO pathway enzymes in wild-type and MtlN-KO mouse hearts. Related to Figure 5. (A)** Western blot analyses performed on whole-tissue lysates from mouse hearts for the indicated proteins, which all appear to be expressed at similar levels in WT and KO mice. **(B)** BN-PAGE western blots for ACAD9 and MtlN in isolated mitochondrial show apparent loss of ACAD9 dimers in MtlN-KO mice; the dimers appear to co-migrate with MtlN containing complexes. Note: the anti-rabbit secondary antibody cross-reacts with a complex III subunit.
