# Supplementary material for: Mitoregulin: A lncRNA-Encoded Microprotein that Supports Mitochondrial Supercomplexes and Respiratory Efficiency
Source: PubMed Central journal article supplement — Cell Rep. Author manuscript; Available in PMC 2018 Aug 14. (PMC6091870; doi:10.1016/j.celrep.2018.06.002), 2018-06-26
Supplement: NIHMS1500496-supplement-6.pdf [file NIHMS1500496-supplement-6.pdf]

## Mitoregulin: A lncRNA-Encoded Microprotein that Supports Mitochondrial Supercomplexes and Respiratory Efficiency

### Graphical Abstract

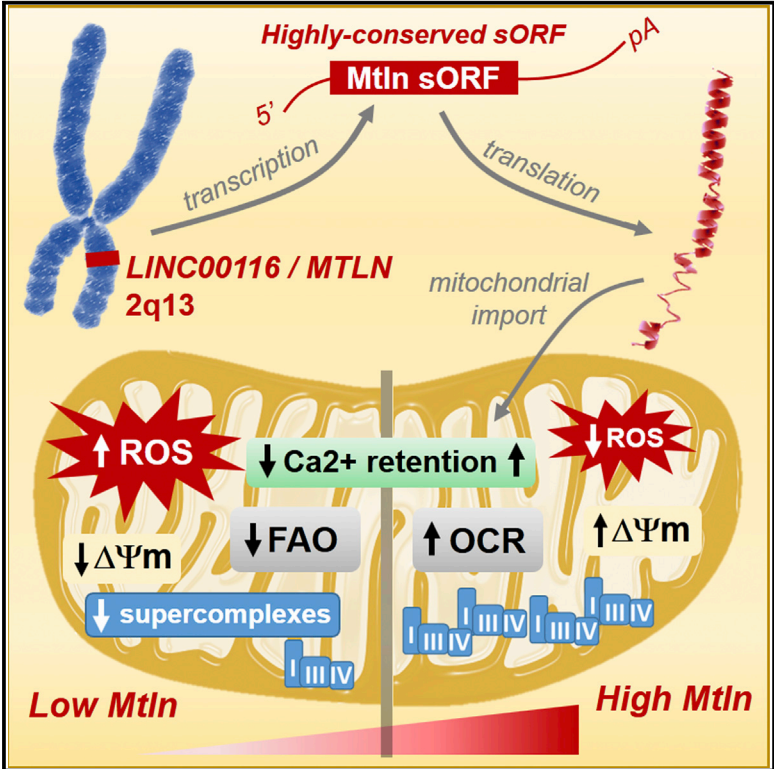

### Authors

Colleen S. Stein, Pooja Jadiya, Xiaoming Zhang, ..., Ethan J. Anderson, John W. Elrod, Ryan L. Boudreau

### Correspondence

ryan-boudreau@uiowa.edu

### In Brief

Stein et al. show that the long non-coding RNA LINC00116 encodes a highly conserved single-pass transmembrane protein named mitoregulin (MtlN). Studies in cells and mice demonstrate that MtlN localizes to inner mitochondrial membranes, where it interacts with several complexes to influence mitochondrial membrane potential, respiration, Ca<sup>2+</sup> retention capacity, ROS, and supercomplex levels.

### Highlights

- *LINC00116* encodes a single-pass transmembrane protein known as mitoregulin (MtlN)
- MtlN appears to be a sticky inner mitochondrial membrane protein that binds cardiolipin
- MtlN levels influence mitochondrial respiration, ROS, and Ca<sup>2+</sup> retention capacity
- MtlN-KO mice exhibit deficiencies in FAO, mCa<sup>2+</sup> retention, and supercomplexes

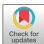

# Mitoregulin: A lncRNA-Encoded Microprotein that Supports Mitochondrial Supercomplexes and Respiratory Efficiency

Colleen S. Stein,<sup>1</sup> Pooja Jadiya,<sup>2</sup> Xiaoming Zhang,<sup>1</sup> Jared M. McLendon,<sup>1</sup> Gabrielle M. Abouassaly,<sup>1</sup> Nathan H. Witmer,<sup>1</sup> Ethan J. Anderson,<sup>3</sup> John W. Elrod,<sup>2</sup> and Ryan L. Boudreau<sup>1,4,\*</sup>

<sup>1</sup>Department of Internal Medicine, Fraternal Order of Eagles Diabetes Research Center, Abboud Cardiovascular Research Center, Carver College of Medicine, University of Iowa, Iowa City, IA, USA

<sup>2</sup>Center of Translational Medicine, Lewis Katz School of Medicine at Temple University, Philadelphia, PA, USA

<sup>3</sup>Department of Pharmaceutical Sciences and Experimental Therapeutics, Fraternal Order of Eagles Diabetes Research Center, Abboud Cardiovascular Research Center, College of Pharmacy, University of Iowa, Iowa City, IA, USA

<sup>4</sup>Lead Contact

\*Correspondence: [ryan-boudreau@uiowa.edu](mailto:ryan-boudreau@uiowa.edu)  
<https://doi.org/10.1016/j.celrep.2018.06.002>

## SUMMARY

Mitochondria are composed of many small proteins that control protein synthesis, complex assembly, metabolism, and ion and reactive oxygen species (ROS) handling. We show that a skeletal muscle- and heart-enriched long non-coding RNA, *LINC00116*, encodes a highly conserved 56-amino-acid microprotein that we named mitoregulin (MtlN). MtlN localizes to the inner mitochondrial membrane, where it binds cardiolipin and influences protein complex assembly. In cultured cells, MtlN overexpression increases mitochondrial membrane potential, respiration rates, and Ca<sup>2+</sup> retention capacity while decreasing mitochondrial ROS and matrix-free Ca<sup>2+</sup>. MtlN-knockout mice display perturbations in mitochondrial respiratory (super)complex formation and activity, fatty acid oxidation, tricarboxylic acid (TCA) cycle enzymes, and Ca<sup>2+</sup> retention capacity. Blue-native gel electrophoresis revealed that MtlN co-migrates alongside several complexes, including the complex I assembly module, complex V, and supercomplexes. Under denaturing conditions, MtlN remains in high-molecular-weight complexes, supporting its role as a sticky molecular tether that enhances respiratory efficiency by bolstering protein complex assembly and/or stability.

## INTRODUCTION

Only ~5% of the human genome encodes for proteins, yet studies show that much of our DNA gives rise to thousands of uncharacterized RNAs (ENCODE Project Consortium, 2012). Although many are annotated as long non-coding RNAs (lncRNAs) that are thought to serve gene regulatory roles, emerging ribosomal profiling data support that several harbor actively translated short open-reading frames (sORFs) that

encode previously overlooked microproteins (<100 amino acids, below the traditional cutoff applied for ORF annotation) (Bazzini et al., 2014). Several follow-up investigations have shown that some lncRNA-derived microproteins are highly conserved across species and play important roles in ion channel modulation, cell signaling, and RNA regulation (Anderson et al., 2016; D'Lima et al., 2017; Matsumoto et al., 2017). Although some studies have demonstrated that lncRNAs control cellular bioenergetics through gene regulatory mechanisms (Long et al., 2016), the potential involvement of lncRNA-derived microproteins in cellular metabolism remains underexplored.

Mitochondria generate the bulk of cellular ATP via oxidative phosphorylation (OXPHOS), supported by reducing equivalents generated by the tricarboxylic acid (TCA) cycle and fatty acid  $\beta$ -oxidation (FAO). Also, mitochondria play crucial roles in Ca<sup>2+</sup> homeostasis, reactive oxygen species (ROS) generation and removal, redox signaling, and cell death regulation. Mitochondria are composed of >1,000 proteins, many of which are assembled into distinct complexes in inner and outer mitochondrial membranes (IMMs and OMMs), with many subunits deriving from nuclear-encoded genes (Calvo et al., 2016). Indeed, mitochondrial proteins are enriched among the hundreds of currently annotated proteins with <100 amino acids; these include subunits of the mitochondrial ribosome, protein import machinery, and respiratory chain complexes, along with related assembly factors (Amunts et al., 2015; Guerrero-Castillo et al., 2017; Letts et al., 2016).

Mitochondrial assembly factors facilitate the precise construction and arrangement of mitochondrial protein complexes. The OXPHOS machinery is made up of ~100 subunits distributed across five major complexes, including the electron transport chain, which can be further arranged into supercomplexes to optimize electron transfer and energy return while limiting ROS generation. Despite much progress, there remains great interest in understanding the pathways that guide and support these architectural configurations (Cogliati et al., 2016; Guerrero-Castillo et al., 2017; Letts et al., 2016; Ostojic et al., 2013; Stroud et al., 2016). Numerous investigations of mutations in patients with mitochondrial deficiencies have identified specific assembly factors that contribute to respiratory chain dysfunction

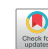

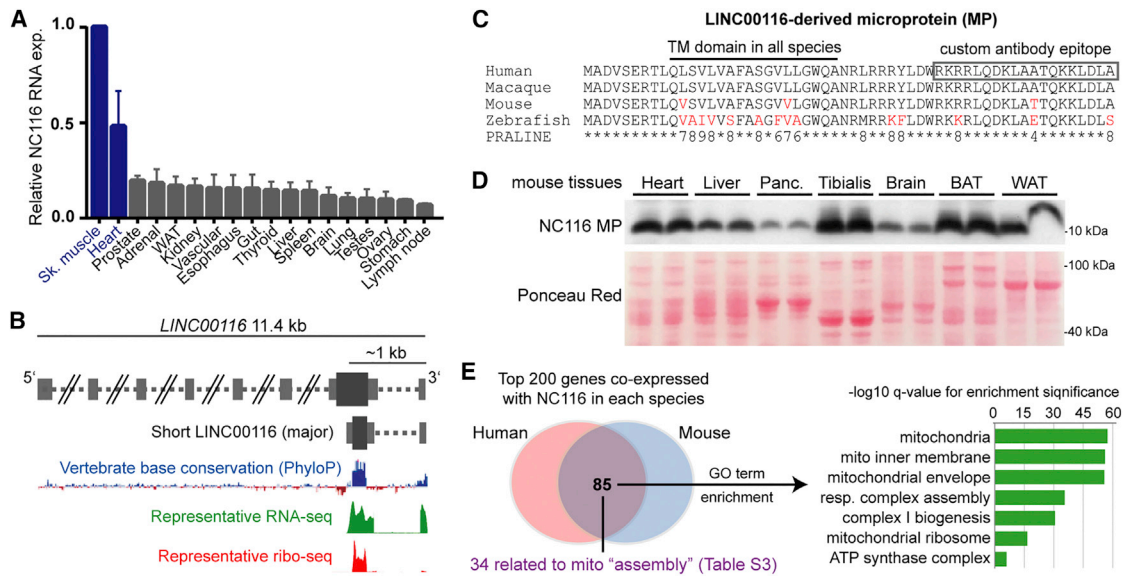

**Figure 1. Human *LINC00116* Encodes a Highly Conserved Muscle- and Heart-Enriched Microprotein**

(A) Summarized *LINC00116* RNA expression data from four independent human RNA-seq body-map datasets are plotted (mean  $\pm$  SEM) relative to skeletal muscle, which had the highest *LINC00116* expression levels in all four datasets.

(B) Schematic of the *LINC00116* locus genomic architecture based on UCSC Genome Browser (hg19) annotations and expression data from GWIPS-viz ribosomal profiling database, the latter of which indicates the presence of a highly conserved sORF that is translated by ribosomes (ribo-seq).

(C) Multi-species alignment of the predicted *LINC00116*-derived microprotein (NC116-MP) performed using PRALINE algorithm after *in silico* translation of the conserved homologous sORFs in the indicated species. A conserved transmembrane (TM) domain is predicted in all species (PHOBIUS and TMHMM algorithms). The majority of non-perfectly conserved residues (red) represent conservative substitutions (higher PRALINE scores, range 0–10).

(D) A custom antibody was generated against the indicated C-terminal region, and western blot analysis on mouse tissue panels revealed a prominent 10-kDa band enriched in muscle and heart tissues. This band was not present in NC116-MP knockout mouse tissues (Figure S1).

(E) RNA co-expression analysis done by querying CoXpresDB database for *LINC00116* and the mouse homolog, *1500011K16Rik* indicated a clear overlap of co-expressed genes in both species. Gene ontology analyses revealed that the overlapping genes are strongly enriched for mitochondrial-related functions (Table S2). Among the 85 shared genes, 34 have reported functions related to mitochondrial complex and supercomplex assembly (Table S3).

(Abdulhag et al., 2015; Alston et al., 2016; Fernandez-Vizarrá et al., 2007; Heide et al., 2012; Nouws et al., 2010; Ogilvie et al., 2005; Saada et al., 2009; Sugiana et al., 2008). Considering the number of unsolved clinical cases of mitochondrial deficiency, it is believed that many assembly factors remain to be discovered. Here, we describe the identification of a new lncRNA-derived microprotein that enhances mitochondrial functions and present data supporting that this may occur via modulation of assembly and stability of complexes and supercomplexes involved in FAO, the TCA cycle, and electron transport.

## RESULTS

### *LINC00116* Encodes a Highly Conserved Muscle-Enriched Transmembrane Microprotein

While evaluating independent human lncRNA expression datasets (GTEx Consortium, 2013; Gibb et al., 2011; Uhlén et al., 2015; Wu et al., 2009), we identified *LINC00116* (NC116) as a skeletal muscle- and heart-enriched lncRNA (Figure 1A). Although genomic annotation suggests that the *NC116* gene spans  $\sim$ 11.4 kb and produces longer-transcript isoforms, available RNA sequencing (RNA-seq) data indicate that the shorter  $\sim$ 440-bp transcript is the major isoform (GTEx Consortium, 2013; Michel et al., 2014) (Figure 1B). While inspecting the

*NC116* genomic architecture, we noted a region of ultraconserved nucleotide base composition within the first exon of the major transcript isoform and hypothesized that this may encode protein. Query of ribosomal profiling datasets support that this region is actively translated in human and mouse cell lines and tissues (Figure 1B) (Bazzini et al., 2014; Michel et al., 2014). *In silico* translation across this region in various species indicated a common sORF that is predicted to encode for a highly conserved 56-amino-acid single-pass transmembrane microprotein (Phobius and TMHMM algorithms; Figure 1C). We generated a custom polyclonal antibody targeting the C-terminal region (Figure 1C) and performed western blot on a panel of mouse tissue lysates, revealing a ubiquitous 10-kDa protein enriched in cardiac and skeletal muscle, as well as adipose tissues (Figure 1D). Clustered regularly interspaced short palindromic repeats/spCas9 (CRISPR/Cas9) technology was used to produce knockout cells and mice by deleting the sORF from the homologous mouse locus (*1500011K16Rik*; Figure S1A). Notably, the 10-kDa protein was undetectable in knockout tissues (Figures S1B).

To gain insight into the function of NC116 microprotein, we performed gene ontology enrichment analysis on genes that are highly co-expressed (i.e., positively correlated) with *NC116*/*1500011K16Rik* RNAs in human and mouse transcriptomic

datasets (Obayashi et al., 2008). Among the top 200 co-expressed genes in both species (Table S1), 85 were shared, and these were strikingly enriched for mitochondrial genes corresponding to various protein machineries, including respiratory chain complexes and mitochondrial ribosomes (Figure 1E; Table S2); overall, 59 of these 85 genes encode proteins annotated as “mitochondrial part.” A closer evaluation of gene functions revealed that the shared co-expression network was specifically related to protein complexing and assembly, with >30 genes having reported roles in assembling respiratory chain complexes, mitochondrial ribosomes, and iron-sulfur clusters (Table S3). Notably, these include 9 of the 15 proteins found at inter-complex interaction sites within the respirasome supercomplex (I-III<sub>2</sub>-IV) (Letts et al., 2016). Together, these data indicated a strong likelihood that NC116 microprotein localizes within mitochondria, where it influences protein complex assembly, and our follow-up experiments (presented below) support this notion. As such, we named this microprotein mitoregulin (MtlN), keeping consistent with the “-regulin” theme for other lncRNA-derived microproteins (Anderson et al., 2016).

### MtlN Microprotein Localizes to Inner Mitochondrial Membranes and Binds Cardiolipin

Localization of MtlN to mitochondria was assessed by microscopy and cell fractionation. In cultured cardiomyocytes, co-labeling revealed a clear overlap of MtlN localization with MitoTracker red (Figure 2A). Bioinformatic predictions indicated that MtlN lacks a classical mitochondrial-targeting sequence; however, MtlN has a high density of conserved, positively charged residues that likely promote mitochondrial import (Figure 1C), and fusing MtlN to the N terminus of GFP (MtlN-GFP) was sufficient to target GFP fluorescence to mitochondria (Figure 2B). Similarly, MtlN-FLAG-tagged protein also localized to mitochondria (Figure S2). In cell fractionation studies, MtlN was found to be enriched in mitochondrial pellets, along with other known mitochondrial proteins (Cox4 and Vdac1; Figure 2C). In addition, MtlN remained in the pellets upon treatment with increasing digitonin, which releases OMMs and associated proteins (e.g., Vdac1), supporting that MtlN predominantly localizes to IMMs, like Cox4 (Figure 2D). Further investigation using classical proteinase-K-based studies of mitochondrial protein topology corroborated localization to the IMM and revealed that the MtlN C terminus primarily projects into the intermembrane space (IMS), as indicated by a notable decrease in western blot detection of the C-terminal region in mitochondrial preparations treated with proteinase K in hypotonic buffer, which selectively disrupts OMMs; similar observations were made for cytochrome c (CytC; a known IMS protein; Figure 2E).

Cardiolipin is a phospholipid found almost exclusively in IMMs, where it confers optimal mitochondrial functions by maintaining the structural integrity of the membrane and embedded protein complexes, including respiratory supercomplexes (Pfeiffer et al., 2003). Cardiolipin is known to bind to positively charged arginine and lysine residues on many mitochondrial proteins. Given that MtlN is a transmembrane protein rich in these residues, we investigated their potential interaction and found that cardiolipin-coated beads pulled down MtlN from wild-type mouse cardiac tissue lysates to a similar or

greater degree compared to subunit c, an ATP synthase subunit with high affinity for cardiolipin (Figure 2F). A lipid-strip binding assay further supported that MtlN preferentially engages cardiolipin relative to other common cell membrane lipids (Figure 2G).

### MtlN Overexpression Increases Mitochondrial Respiratory and Ca<sup>2+</sup> Buffering Capacities while Decreasing ROS

To assess MtlN functions, we generated and tested doxycycline-inducible (“Dox-On”) MtlN overexpression vectors in cultured human HeLa cells. MtlN+Dox treatment elevated MtlN protein levels ~10-fold ( $p < 0.01$ ) after 48 hr relative to control  $\beta$ -gal+Dox or MtlN-Dox (“no Dox”) but did not significantly influence relative levels of the five OXPHOS complexes per OXPHOS cocktail western blot or by Coomassie visualization after blue-native polyacrylamide gel electrophoresis (BN-PAGE; Figure 3A). In-gel complex I (CI) activity was also measured, given that co-expression data linked MtlN with CI assembly (Figure 1E; Table S2), but MtlN overexpression had no discernible effect on CI activity. Interestingly, overexpression of MtlN increased mitochondrial membrane potential (35%,  $p < 0.0001$ ; tetramethylrhodamine, ethyl ester [TMRE] staining) with concomitant reductions in mitochondrial ROS (–60%,  $p < 0.0001$ ; MitoSox staining) relative to controls (Figure 3B). MtlN+Dox cells also had increased basal and maximal mitochondrial respiration rates (70% and 35%, respectively,  $p < 0.05$ ; Figure 3C) and decreased extracellular acidification rates (ECARs; glycolytic capacity down ~20%,  $p < 0.05$ ; Figure S3A), supporting a MtlN-induced switch from glycolysis to OXPHOS. In addition, respiration appeared more tightly coupled in MtlN+Dox cells, as evidenced by increased ATP-linked respiration (70%,  $p < 0.001$ ; Figure S3B). Notably, these MtlN-induced effects seem to occur independent of alterations in mitochondrial mass; i.e., no clear changes in (1) OXPHOS complex levels, (2) cellular mitochondrial densities observed in TMRE and MitoSox imaging studies, and (3) mitochondrial DNA content (Figure S4A). Cardiolipin levels were also unchanged (Figure S4C).

Mitochondrial membrane potential and ATP generation is tightly coupled to mitochondrial Ca<sup>2+</sup> (mCa<sup>2+</sup>) dynamics, which serve to activate mCa<sup>2+</sup>-dependent dehydrogenases in the TCA cycle and mediate mitochondrial permeability transition pore (mPTP) opening and cell death signaling. Thus, we evaluated mCa<sup>2+</sup> dynamics and found that MtlN+Dox cells had increased mCa<sup>2+</sup> retention capacity (65%;  $p < 0.01$ ; Figure 3D), relative to controls, despite no differences in mCa<sup>2+</sup> uptake kinetics or magnitude. Parallel experiments indicated that MtlN+Dox cells had significantly reduced matrix-free Ca<sup>2+</sup> (35%,  $p < 0.01$ ; Figure 3E), which along with decreased ROS levels could account for the increased mCa<sup>2+</sup> retention capacity and delayed triggering of mPTP in MtlN+Dox cells.

### Acute MtlN Inhibition Depresses Mitochondrial Membrane Potential and Increases Mitochondrial ROS

Given that gene overexpression studies may achieve supraphysiologic protein levels, we evaluated the effects of MtlN gene silencing in cultured HeLa cells. First, a panel of four small interfering RNAs (siRNAs) targeting human MtlN mRNA (siMtlN1-4; Table S4) were tested for gene silencing efficiency; each

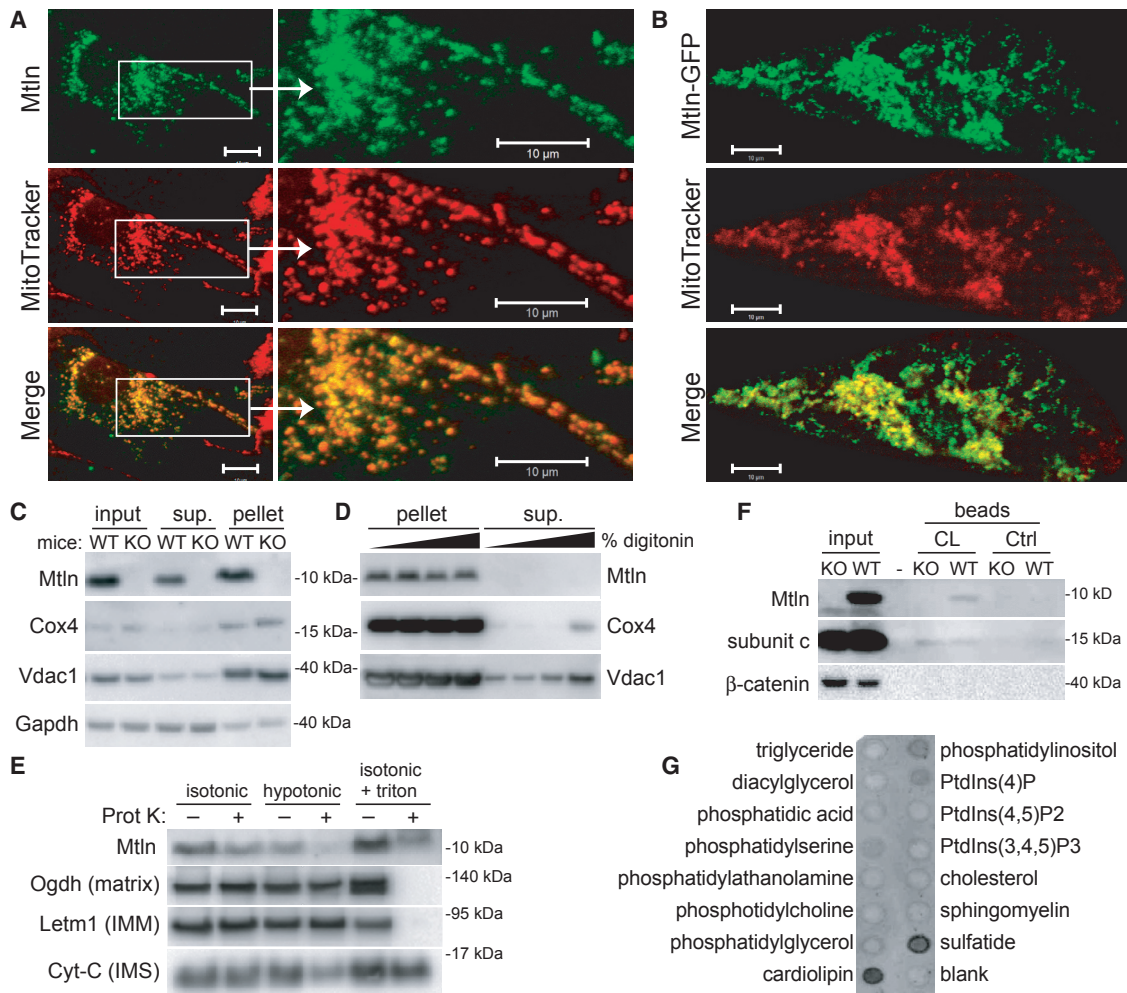

**Figure 2. The *LINC00116*-Derived Microprotein Mitoregulin Localizes to Inner Mitochondrial Membranes and Binds Cardiolipin**

(A and B) Wild-type (A) and GFP-tagged (B) human Mtin were expressed in neonatal rat cardiomyocytes, and co-localization with MitoTracker red was evaluated. Representative photomicrographs are shown. Scale bars, 10  $\mu$ m.

(C) Mitochondrial pellets were isolated from wild-type (WT) or Mtin-knockout (KO) C2C12 myoblast cells, and western blot was performed on various fractions.

(D) Mitochondrial pellets harvested from WT or Mtin-KO skeletal muscle tissues were treated with increasing digitonin concentrations to release OMMs, and pellet and supernatant fraction fractions were subjected to western blot analysis. Cox4 and Vdac1 are known IMM and OMM proteins, respectively. Gapdh is a cytosolic protein known to associate with mitochondria in some cases.

(E) Mitochondrial pellets harvested from WT skeletal muscle tissues were resuspended in isotonic, hypotonic, or isotonic plus triton buffers in the absence or presence of proteinase K and subjected to western blot analysis. Proteins with known localization to various mitochondrial compartments (e.g., matrix, IMM, and intermembrane space [IMS]) were evaluated as controls.

(F) Western blot analysis performed on WT and Mtin-KO cardiac tissue lysates subjected to pull-down assay using cardiolipin (CL)-coated or control beads. Subunit c, a known cardiolipin-binding protein, serves as the positive control.

(G) Lipid-strip binding assay performed using synthetic Mtin protein followed by anti-Mtin immunoblot.

suppressed Mtin protein expression in a dose-dependent manner within 48 hr post-transfection, with the most efficacious sequences (siMtin-1 and siMtin-3) achieving  $\sim$ 90% suppression at a higher dose (50 nM; Figure 4A) relative to negative control sequences. Subsequent imaging studies revealed that HeLa cells treated with siMtin-1 and siMtin-3 showed marked decreases in mitochondrial membrane potential ( $\geq$ 50%,  $p < 0.0001$ ; TMRE staining) and concomitant increases in mitochondrial ROS ( $\sim$ 2-fold,  $p < 0.0001$ ; MitoSOX staining) relative to controls (Figure 4B). Notably, these results reciprocate our findings

in overexpression studies (Figure 3), and similar to those studies, Mtin suppression did not significantly alter levels of respiratory chain complexes, as determined by OXPHOS cocktail western blot (Figure 4A), nor cardiolipin levels (Figure S4D).

#### Mtin-KO Mice Exhibit Defects in Fatty Acid Oxidation and Mitochondrial $Ca^{2+}$ Dynamics but Lack Overt Signs of Oxidative Stress

CRISPR/Cas9-derived Mtin-KO mice are viable and develop normally with no overt phenotypes later in life. Given that Mtin

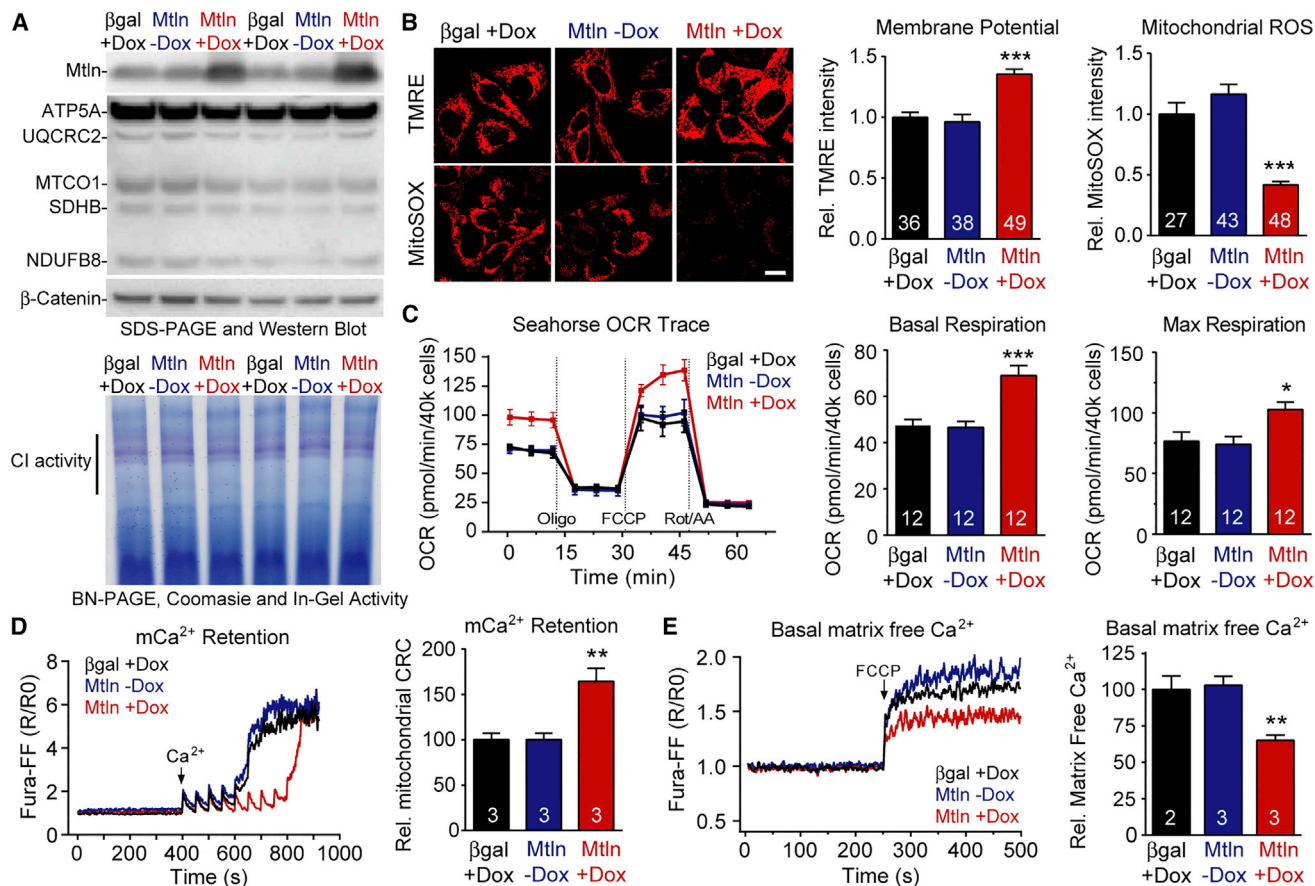

**Figure 3. Mtn Overexpression Alters Mitochondrial Membrane Potential, ROS, Respiration, and Ca<sup>2+</sup> Handling in Human HeLa Cells**

Doxycycline (DOX)-inducible expression vectors were used to overexpress Mtn and beta-galactosidase ( $\beta$ gal, control) in cultured human HeLa cells, and protein measures and mitochondria-related analyses performed 48 hr later. Mtn-Dox (i.e., no Dox) serves as additional control.

(A) Top, western blot shows clear Mtn overexpression in Mtn+Dox cells, relative to controls, but does not significantly alter respiratory complex levels by OXPHOS cocktail blot or BN-PAGE/Coomassie blue (bottom). Bottom, complex I (CI) in-gel activity assay.

(B) Representative photomicrographs depicting TMRE (mitochondrial membrane potential) and MitoSOX (ROS) probe intensities in treated cells. Scale bar, 20  $\mu$ m. Quantified probe intensities are plotted at right.

(C) Standard mitochondrial respiration assays were performed in treated cells and oxygen consumption rates (OCR) plotted at right. Refer to Figure S3 for additional measures.

(D and E) Mitochondrial Ca<sup>2+</sup> (mCa<sup>2+</sup>) dynamics were evaluated in treated cells; representative traces and quantified data are shown for Ca<sup>2+</sup> retention capacity (CRC) assay (D) and measures of matrix-free Ca<sup>2+</sup> (E). Graphs are plotted as mean  $\pm$  SEM, sample *n* is indicated within each bar, and *p* values were determined by one-way ANOVA with Dunnett's post hoc (\**p* < 0.05, \*\**p* < 0.01, and \*\*\**p* < 0.001 compared to  $\beta$ gal+Dox).

is enriched in skeletal muscle and cardiac tissues and overexpression altered mCa<sup>2+</sup> dynamics in cells, we subjected Mtn-KO mice and wild-type (WT) littermates to exercise tolerance testing on treadmills using "sprint" and gradual acceleration (i.e., "endurance") paradigms but found no genotype-based differences in performance (Figures S5A and S5B). We next evaluated mitochondrial respiratory activities in cardiac and skeletal muscle fibers prepared from fed mice or mice subjected to a 24-hr fast to activate FAO. In the fed state, Mtn-KO and WT muscle fibers showed comparable basal and maximal ADP-stimulated respiration rates in the presence of either carbohydrate-based (pyruvate, glutamate, succinate; Figure S5C) or fatty acid (palmitoyl-carnitine [PC]; Figure 5A) substrates. However, in fasted mice, Mtn-KO skeletal muscle (SKM) fibers showed

significantly lower rates (~30%) of maximal fatty acid (PC) oxidation relative to WT controls (*p* = 0.02; Figure 5A), and left ventricular (LV) fibers showed a similar trend (20% decreased, *p* = 0.09). Also, mCa<sup>2+</sup> uptake and retention assays performed on LV fibers indicated that Mtn-KO mitochondria have reduced mCa<sup>2+</sup> retention capacity compared to WT (27%, *p* < 0.05, Figure 5B). Notably, mitochondrial DNA content and cardiolipin levels were not altered in Mtn-KO mice (Figures S4B and S4E). Overall, these data are consistent with and reciprocate our *in vitro* findings with Mtn overexpression.

Given our *in vitro* data indicating that manipulation of Mtn expression alters mitochondrial ROS, we evaluated Mtn-KO mouse muscle and heart tissues for signs of oxidative stress. Levels of glutathione (both reduced [GSH] and oxidized

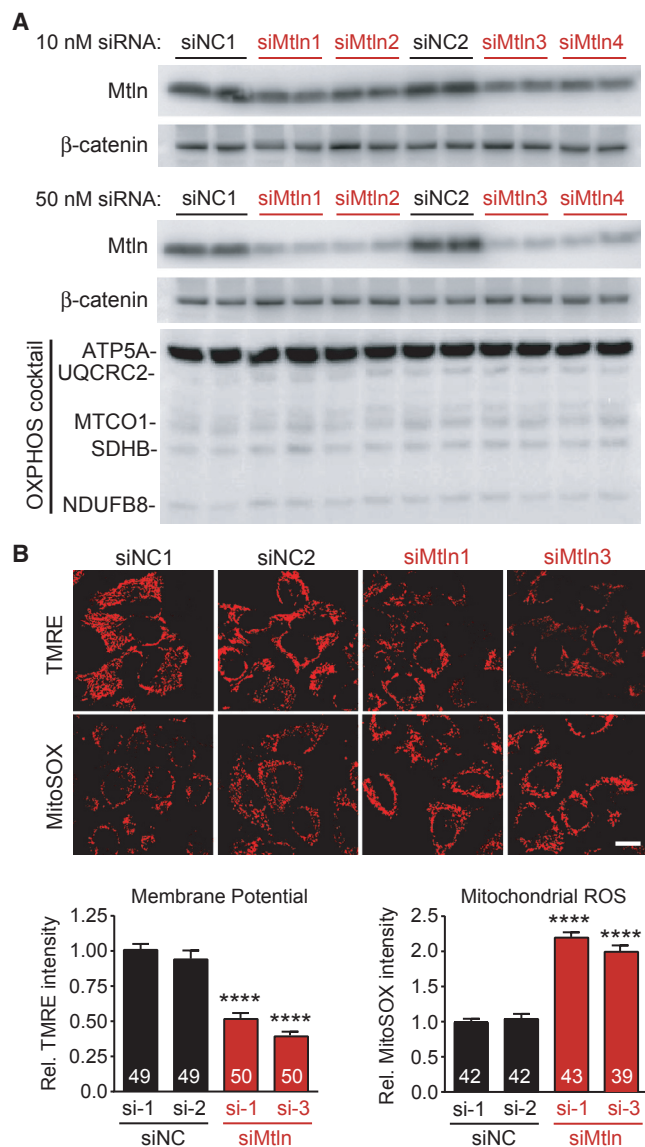

**Figure 4. Mtn Suppression Alters Mitochondrial Membrane Potential and ROS in Human HeLa Cells**

Mtn expression was inhibited in cultured human HeLa cells using siRNAs, and protein measures and mitochondrial imaging analyses were performed 48 hr later.

(A) Western blot shows clear reductions in Mtn expression in cells treated with Mtn-targeted siRNAs (siMtn1-4, each representing unique siRNA sequences), relative to two non-targeted negative control siRNAs (siNC1-2). 10 nM (top) and 50 nM (bottom) doses were tested. OXPPOS cocktail protein levels did not change in response to Mtn knockdown in any siMtn treatment group.

(B) Top, representative photomicrographs depicting TMRE (mitochondrial membrane potential) and MitoSOX (ROS) probe intensities in HeLa cells treated with 50 nM of the indicated siRNAs. Scale bar, 20  $\mu$ m. Bottom, quantified probe intensities are plotted as mean  $\pm$  SEM, sample *n* is indicated within each bar, and *p* values were determined by one-way ANOVA with Dunnett's post hoc (\*\*\*\**p* < 0.0001 compared to  $\beta$ gal+Dox).

[GSSG] forms) were not significantly different in WT and Mtn-KO mouse muscle whole-tissue lysates (Figure S6A), nor were aconitase activities in crudely isolated mitochondria, a surrogate measure of mitochondrial ROS, which is known to suppress aconitase activity (Figure S6B). Furthermore, western blot analyses indicated that expressions of key mitochondrial antioxidant enzymes (e.g., SOD2, GPX1, and GPX4) were similar in WT and Mtn-KO mouse tissues (Figure S6C).

### Mtn Influences Mitochondrial Protein Complex Assembly and/or Stability

To gain insight into the mechanistic actions of Mtn, we performed OXPPOS cocktail western blot, BN-PAGE analyses, and in-gel activity studies to evaluate the effects of loss of Mtn on mitochondrial protein assemblies and to characterize Mtn distribution among them. Mtn-KO and WT cardiac and skeletal muscle tissue lysates showed no overt genotype-based differences in the major respiratory complex levels (OXPPOS cocktail blot; Figure S7A), though decreases in respiratory supercomplexes were evident in Mtn-KO hearts (Figure 5C) and skeletal muscles (Figure S7B). In-gel activity assays showed aberrations in CI distribution in Mtn-KO cardiac tissue samples, with a distinct loss of a high-molecular-weight supercomplex (SC; Figure 5C, left, top red arrow) and qualitative but consistent increases in free or disassembled CI-associated complexes in heart samples (green arrows; see Figure S8 for higher-magnification images). Western blotting for the CI subunit NDUFA9 indicated a correlation between CI activity and levels of the corresponding CI-containing complexes (Figure 5C, right). Mtn-KO skeletal muscle samples also showed reduced CI activities within both I+III<sub>2</sub> supercomplexes and respirasomes (I+III<sub>2</sub>+IV) (Figure S7C). Of note, the previously characterized non-specific CI activity band, resulting from dihydroliipoamide dehydrogenase (DLD) activity (Yan and Forster, 2009), was overtly diminished in Mtn-KO samples. Subsequent BN-PAGE western blot revealed that Mtn co-migrates with several notable complexes, including the CI assembly module (CIA; Alston et al., 2016; Heide et al., 2012), complex V, and various supercomplexes, and appears in lower complexes of unknown identity (Figures 5D and S7D), thus supporting a broad distribution of Mtn throughout the IMM.

Consistent with the overt reduction in mitochondrial DLD activity, dimers of oxoglutarate dehydrogenase (OGDH), the first and rate-limiting step of the OGDHC, a multi-enzyme complex that includes DLD, were also severely decreased in mitochondria (216-kDa band; smearing may indicate possible membrane association). Notably, no expression changes were observed for these and other OGDHC subunits in whole-tissue lysates (Figures 5E and S9A).

To further investigate a potential Mtn-related impact on protein-protein interactions or membrane docking, we performed SDS-PAGE and BN-PAGE western blotting to evaluate levels and distributions of ACAD9 and VLCAD proteins, which are FAO pathway enzymes known to dimerize and tether with IMMs, where they function; interestingly, ACAD9 also plays a role in CI assembly (He et al., 2007; Nouws et al., 2010; Souri et al., 1998). Mtn-KO samples showed a clear loss of ACAD9 dimers, which appeared to co-migrate closely with a Mtn-positive band (Figures 5E and S9B); also, VLCAD distribution was

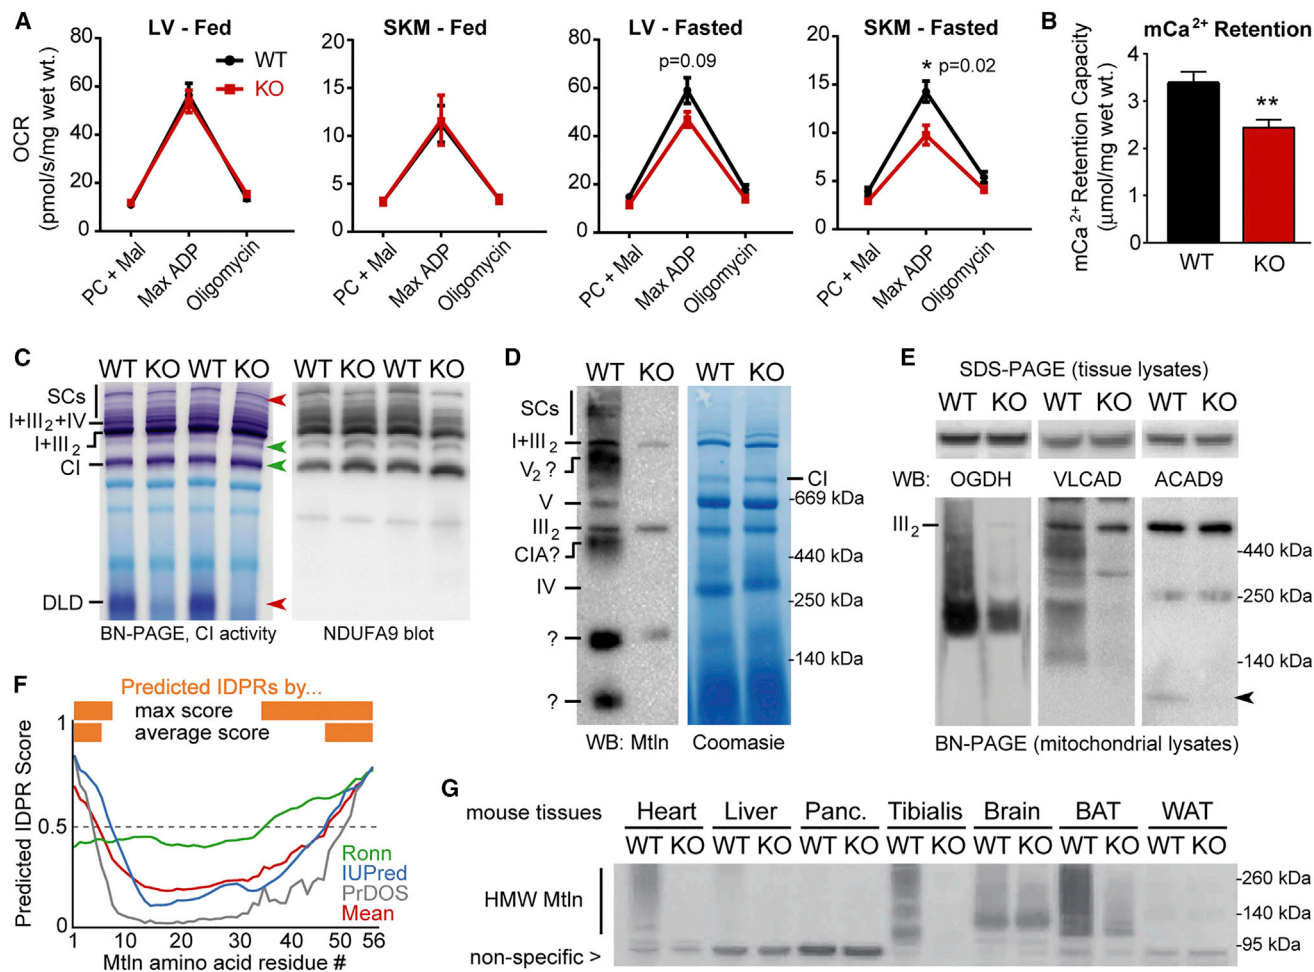

**Figure 5. MtlN-KO Mice Exhibit Alterations in Mitochondrial Metabolism, Ca<sup>2+</sup> Retention, and Protein Complex Assemblies**

(A) Permeabilized muscle fibers (cardiac, left ventricular [LV], and skeletal muscle [SKM], gastrocnemius) were harvested from fed or fasted (24 hr) WT or MtlN-KO mice, and oxygen consumption rates (OCR) were measured during sequential addition of palmitoyl-carnitine/malate (PC + Mal), 1 mM ADP (Max ADP), and oligomycin; data are plotted as mean ± SEM. Fed: WT n = 7 (4 males, 3 females), KO n = 7 (3 males, 4 females); fasted: n = 4 females for both WT and KO. (B) Mitochondrial Ca<sup>2+</sup> retention capacities were measured in permeabilized LV fibers from fasted female mice (n = 4/genotype) and plotted as mean ± SEM; \*\*p = 0.01.

(C) In-gel CI activity assay was performed on cardiac tissue mitochondrial lysates from fed WT female mice (n = 3-4/genotype, representative gels shown) (left). Red and green arrows denote bands with decreased or increased (respectively) CI activity in KO mice. Top red arrow points to a doublet band in WT hearts, with the top band virtually absent in KO mice. BN-PAGE and western blot for CI subunit NDUFA9 was performed on the same samples (right). See Figure S7B for SKM tissue data. (D) Representative BN-PAGE western blot on cardiac tissue mitochondrial lysates shows co-migration of MtlN with various prominent mitochondrial complexes; see Figure S7D for SKM data. Some non-specific bands (e.g., in the KO lane) arise from the secondary antibody.

(E) SDS-PAGE (top, cardiac tissue lysates) and BN-PAGE (bottom, cardiac mitochondrial lysates) western blots for proteins involved in the TCA cycle (OGDH), CI assembly (ACAD9), and FAO (ACAD9 and VLCAD). Arrow indicates ACAD9 dimers. n = 3-4; representative blots are shown.

(F) IDPR prediction was run on the MtlN protein sequence (56 amino acids) using the three indicated independent algorithms and output scores plotted, along with the mean score (red). Scores above 0.5 indicate predicted IDPRs (orange).

(G) SDS-PAGE western blot for MtlN-containing high-molecular-weight (HMW) assemblies in WT and MtlN-KO mouse tissue panels. Nonspecific band provides loading control for comparing WT and KO lanes.

significantly altered (i.e., lack of bands and smears, consistent with decreased membrane association). Of note, ACAD9 and VLCAD protein levels were not significantly different in whole-tissue lysates (Figures 5E and S9A). Together, these data, along with the DLD and OGDH findings, support that MtlN-KO mitochondria are unable to retain matrix localization of key FAO pathway and TCA cycle enzymes, perhaps resulting from

decreased membrane associations and subsequent protein loss or leak during isolation of crude mitochondria from tissues.

To assess if MtlN has molecular chaperone-like characteristics to support protein-protein interactions and membrane docking, we analyzed MtlN amino acid sequence for the presence of intrinsically disordered protein regions (IDPRs), which are well known to support protein tethering and/or assembly and complex



stabilizing functions (Uversky, 2015). Several independent algorithms predicted that MtlN N- and C-terminal domains harbor IDPRs (Figure 5F). Considering that IDPR-containing proteins are inherently sticky, MtlN may be found in high-molecular-weight (HMW) oligomeric complexes that remain stable under stringent denaturing conditions. To assess this, we performed SDS-PAGE western blot in WT and MtlN-KO mouse tissue panels and found predominant MtlN-containing HMW complexes (distinct bands and smears, not present in MtlN-KO samples) in heart and skeletal muscle (Figure 5G). These data, along with our other observations, support the notion that MtlN fine-tunes mitochondrial functions through broad interactions with an array of protein complexes, supercomplexes, and cardiolipin, possibly playing roles in protein-membrane recruitment, membrane dynamics, and complex assembly and stabilization.

## DISCUSSION

Through exploration of gene expression and genome annotation databases, we discovered that the *LINC00116* lncRNA gene encodes for a mitochondrial single-pass transmembrane protein that we named MtlN. Previous high-throughput ribosomal profiling studies have shown that *LINC00116* harbors one of many transcriptome-wide sORFs that are engaged by actively translating ribosomes (Bazzini et al., 2014). Proteomics investigations have noted the existence of peptides mapping to this sORF (Catherman et al., 2013; Chen et al., 2015). One of these studies found MtlN peptides in the detergent insoluble fraction, which could explain (along with its tiny size) why this protein has not been identified in many unbiased proteomic analyses. This finding is consistent with our observation that MtlN has sticky IDPR domains and appears to form highly stable, SDS-resistant HMW complexes that may represent MtlN oligomeric structures and/or MtlN complexed with many other IDPR-containing mitochondrial proteins.

Our co-expression analyses revealed that MtlN is tightly linked to a distinct gene network dedicated to mitochondrial protein complex assembly. It is worth reiterating that this network includes several known respiratory chain complex assembly factors, and impressively, 6 of the top 10 most highly co-expressed genes encode for proteins found at inter-complex contact sites within the respirasome supercomplex (Table S3) (Letts et al., 2016). This is notable considering that only ~15 proteins have been identified as respirasome “contact-site” proteins. However, given that the current respirasome crystal structures lack unannotated transmembrane alpha-helices, it is unlikely that MtlN is part of the mature respirasome, unless it is lost during purification and/or crystallization steps.

In accord with co-expression data pointing to MtlN's supportive role in protein complex assembly, our experimental data demonstrate that its physiologic function serves to enhance mitochondrial efficiency. MtlN overexpression in HeLa cells supercharged mitochondrial functions, as evidenced by increased membrane potential, respiration, and mCa<sup>2+</sup> retention capacity, with a surprising decrease in mitochondrial ROS, all of which are consistent with improved respiratory chain complexing, supercomplexing, and coupling (Lopez-Fabuel et al., 2016; Maranzana et al., 2013). Notably, this might account for the decreased

ROS, which could subsequently desensitize mCa<sup>2+</sup>-induced triggering of mPTP, as was observed. Although MtlN overexpression did not cause overt changes in levels of OXPHOS machinery or respiratory supercomplexes, it is possible that subtle increases in supercomplexes could account for the improved respiratory capacity, as was previously observed with COX6B1 overexpression in cultured cells (Kim et al., 2015).

Our findings with MtlN overexpression *in vitro* were reciprocated, in part, in HeLa cells with MtlN knockdown, which showed decreased mitochondrial membrane potential and increased ROS, as well as in MtlN-KO mice, which exhibited decreased mCa<sup>2+</sup> retention capacity and impaired FAO upon fasting, which is a well-established activator of FAO in muscle tissues and was more recently found to rewire respiratory supercomplex configurations in mice, likely in response to altered substrate usage (Lapiente-Brun et al., 2013). It is possible that MtlN-KO mice exhibit inefficient mitochondrial complex organization or reorganization to accommodate metabolic switches. Unlike our *in vitro* studies, MtlN-KO muscle tissues did show alterations in CI distribution and activity and levels of respiratory supercomplexes, along with changes in TCA cycle and FAO protein complex distributions. Increased levels of free CI and decreased supercomplexes, as observed in MtlN-KO mice, have been linked to a significant elevation in ROS (Lopez-Fabuel et al., 2016; Maranzana et al., 2013). However, our assessments of oxidative stress in the MtlN-KO mice yielded no significant findings. It is likely that the cells or mitochondria adapt to accommodate for mild deficiencies in respiratory activity and mCa<sup>2+</sup> handling; future studies testing acute MtlN-knockdown or knockout in adult animals may reveal more profound physiological effects in mice.

Our BN-PAGE data suggest that MtlN elicits broad functions through interactions with an array of mitochondrial proteins. Thus far, we have been unsuccessful in our attempts to identify MtlN-interacting proteins by co-immunoprecipitation (co-IP) coupled with mass spectrometry; it is possible that during IP, our custom C-terminal-targeted antibody competes off key interactors bound to this region, which corresponds to the predominant extra-membrane portion of this small transmembrane protein. Alternatively, MtlN may interact, perhaps transiently, with many proteins, which could be “diluted” out in IP samples. Notably, our SDS-PAGE data also hint at the inherent sticky nature of this microprotein. Although not all sticky proteins are necessarily chaperones, given MtlN's small size, lack of enzymatic domains, and lack of a clear single interacting complex, we speculate that MtlN, in part, serves as a mitochondrial molecular chaperone within the IMM; nevertheless, we cannot rule out other unforeseen functions that may be elucidated through future investigations.

Despite our observation that MtlN loss leads to deficiency in FAO, we believe that this occurs downstream of defects in respiratory chain activity (Nsiah-Sefaa and McKenzie, 2016) or tethering FAO and electron transport chain (ETC) systems (Wang et al., 2010), given that the co-expression data firmly integrate MtlN within a gene network related to respiratory complex and supercomplex assembly. Conversely, FAO pathway constituents (VLCAD, MCAD, and LCAD) are quite far removed from this co-expression module, and a dedicated co-expression analysis for VLCAD reveals a clear signature of known FAO pathway

genes as expected. These findings reiterate the power of using gene co-expression analyses to help pinpoint the functions of newly identified mitochondrial proteins and/or known proteins with enigmatic roles in mitochondrial biology. Building and interrogating co-expression networks for known respiratory complex assembly factors could stimulate future searches for new related factors.

In summary, our findings highlight the need to continue exploring the vast non-coding RNA landscape for mitochondrial-related sORFs. In addition, follow-up studies are needed to (1) further define MtlN's precise molecular functions, (2) determine how loss of MtlN alters the response to various metabolic stresses (e.g., high-fat diet, starvation, chronic exercise training, and cold exposure), and (3) begin to explore the translational relevance of MtlN expression changes in humans. For example, database searches indicate that *LINC00116* is among the most significantly downregulated genes in aging human skeletal muscles (GEO: GSE362 and GSE674), and the GTEx portal annotates the existence of common genetic variants that strongly associate with *LINC00116* expression in human tissues, including heart, SKM, and fat (GTEx Consortium, 2013). Although these variants have not yet been linked to human phenotypes in genetic association studies, targeted efforts may be required to evaluate their potential influence on human health and disease.

## STAR★METHODS

Detailed methods are provided in the online version of this paper and include the following:

- **KEY RESOURCES TABLE**
- **CONTACT FOR REAGENT AND RESOURCE SHARING**
- **EXPERIMENTAL MODEL AND SUBJECT DETAILS**
  - Cultured cell lines
  - Rodent studies
- **METHOD DETAILS**
  - Analysis of human transcriptomic tissue expression profile data
  - Bioinformatic assessment of *LINC00116* sORF and the resulting MtlN microprotein
  - Co-expression and gene ontology enrichment analyses
  - Western blots
  - Plasmids and viral constructs
  - NRCM **transfection, staining, and imaging**
  - Mitochondrial isolations
  - Graded digitonin extraction of the outer mitochondrial membrane proteins
  - Mitochondrial protein topology assessment with Proteinase K
  - Cardiolipin binding assay
  - Protein lipid strip binding assay
  - Transduction of cells with adenovirus vectors
  - Evaluation of mitochondrial calcium ( $mCa^{2+}$ ) retention capacity and matrix free- $Ca^{2+}$  content
  - Measurement of mitochondrial membrane potential ( $\Delta\Psi_m$ ) and ROS in cells

- Oxygen consumption rate measures in cells
- Determination of mitochondrial and nuclear DNA contents
- Preparation of permeabilized cardiac and skeletal myofibers
- Measurement of mitochondrial  $O_2$  consumption ( $mO_2$ ) and  $Ca^{2+}$  retention capacity in permeabilized cardiac and skeletal myofibers
- Exercise tolerance testing
- Biochemical assays of oxidative stress
- Blue native gel electrophoresis (BNGE), blotting, Coomassie stain, and in-gel activity (IGA)

## ● QUANTIFICATION AND STATISTICAL ANALYSES

## SUPPLEMENTAL INFORMATION

Supplemental Information includes nine figures and four tables and can be found with this article online at <https://doi.org/10.1016/j.celrep.2018.06.002>.

## ACKNOWLEDGMENTS

This work was supported by the American Heart Association (grant 14SDG18590008 to R.L.B.), the Roy J. Carver Trust (University of Iowa to R.L.B.), a Fraternal Order of Eagles Diabetes Research Center Pilot Grant (University of Iowa to R.L.B.), and the NIH NHLBI and NIA (grants HL136954, HL123966, and DA037830 to J.W.E. and grants HL122863 and AG057006 to E.J.A.). J.M.M. was supported by the Abboud Cardiovascular Research Center NIH T32 (grant HL007121). We also acknowledge members of the laboratories of Dale E. Abel, Eric Taylor, Leonid Zingman, and Leonid Sazanov for technical assistance and/or relevant scientific discussions, as well as University of Iowa core facilities that made significant contributions to this work, including the Genome Editing Facility, Viral Vector Core, Genomics Division, and Metabolic Phenotyping Core.

## AUTHOR CONTRIBUTIONS

R.L.B. conceived and designed the project, supervised the research, and analyzed and interpreted the data. C.S.S., P.J., X.Z., J.M.M., G.M.A., N.H.W., and E.J.A. designed and executed experiments, analyzed data, and participated in data interpretation. J.W.E. guided experimental design, supported execution, and helped with data interpretation. R.L.B., C.S.S., E.J.A., and J.W.E. wrote the manuscript.

## DECLARATION OF INTERESTS

The authors declare no competing interests.

Received: January 29, 2018

Revised: May 16, 2018

Accepted: May 30, 2018

Published: June 26, 2018

## REFERENCES

- Abdulhag, U.N., Soiferman, D., Schueler-Furman, O., Miller, C., Shaag, A., Elpeleg, O., Edvardson, S., and Saada, A. (2015). Mitochondrial complex IV deficiency, caused by mutated COX6B1, is associated with encephalomyopathy, hydrocephalus and cardiomyopathy. *Eur. J. Hum. Genet.* **23**, 159–164.
- Alston, C.L., Compton, A.G., Formosa, L.E., Strecker, V., Oláhová, M., Haack, T.B., Smet, J., Stouffs, K., Diakumis, P., Ciara, E., et al. (2016). Biallelic mutations in TMEM126B cause severe complex I deficiency with a variable clinical phenotype. *Am. J. Hum. Genet.* **99**, 217–227.

- Amunts, A., Brown, A., Toots, J., Scheres, S.H.W., and Ramakrishnan, V. (2015). Ribosome. The structure of the human mitochondrial ribosome. *Science* *348*, 95–98.
- Anderson, E.J., and Neuffer, P.D. (2006). Type II skeletal myofibers possess unique properties that potentiate mitochondrial H(2)O(2) generation. *Am. J. Physiol. Cell Physiol.* *290*, C844–C851.
- Anderson, R.D., Haskell, R.E., Xia, H., Roessler, B.J., and Davidson, B.L. (2000). A simple method for the rapid generation of recombinant adenovirus vectors. *Gene Ther.* *7*, 1034–1038.
- Anderson, E.J., Yamazaki, H., and Neuffer, P.D. (2007). Induction of endogenous uncoupling protein 3 suppresses mitochondrial oxidant emission during fatty acid-supported respiration. *J. Biol. Chem.* *282*, 31257–31266.
- Anderson, E.J., Rodriguez, E., Anderson, C.A., Thayne, K., Chitwood, W.R., and Kypson, A.P. (2011). Increased propensity for cell death in diabetic human heart is mediated by mitochondrial-dependent pathways. *Am. J. Physiol. Heart Circ. Physiol.* *300*, H118–H124.
- Anderson, D.M., Makarewich, C.A., Anderson, K.M., Shelton, J.M., Bezprozvannaya, S., Bassel-Duby, R., and Olson, E.N. (2016). Widespread control of calcium signaling by a family of SERCA-inhibiting micropeptides. *Sci. Signal.* *9*, ra119.
- Bazzini, A.A., Johnstone, T.G., Christiano, R., Mackowiak, S.D., Obermayer, B., Fleming, E.S., Vejnar, C.E., Lee, M.T., Rajewsky, N., Walther, T.C., and Giraldes, A.J. (2014). Identification of small ORFs in vertebrates using ribosome footprinting and evolutionary conservation. *EMBO J.* *33*, 981–993.
- Calvo, S.E., Clauser, K.R., and Mootha, V.K. (2016). MitoCarta2.0: an updated inventory of mammalian mitochondrial proteins. *Nucleic Acids Res.* *44* (D1), D1251–D1257.
- Catherman, A.D., Li, M., Tran, J.C., Durbin, K.R., Compton, P.D., Early, B.P., Thomas, P.M., and Kelleher, N.L. (2013). Top down proteomics of human membrane proteins from enriched mitochondrial fractions. *Anal. Chem.* *85*, 1880–1888.
- Chen, Y., Li, Y., Zhong, J., Zhang, J., Chen, Z., Yang, L., Cao, X., He, Q.Y., Zhang, G., and Wang, T. (2015). Identification of missing proteins defined by chromosome-centric proteome project in the cytoplasmic detergent-insoluble proteins. *J. Proteome Res.* *14*, 3693–3709.
- Clayton, D.A., and Shadel, G.S. (2014). Isolation of mitochondria from tissue culture cells. *Cold Spring Harb. Protoc.* *2014*, pdb.prot080002.
- Cogliati, S., Calvo, E., Loureiro, M., Guaras, A.M., Nieto-Arellano, R., Garcia-Poyatos, C., Ezkurdia, I., Mercader, N., Vázquez, J., and Enriquez, J.A. (2016). Mechanism of super-assembly of respiratory complexes III and IV. *Nature* *539*, 579–582.
- D’Lima, N.G., Ma, J., Winkler, L., Chu, Q., Loh, K.H., Corpuz, E.O., Budnik, B.A., Lykke-Andersen, J., Saghatelian, A., and Slavoff, S.A. (2017). A human microprotein that interacts with the mRNA decapping complex. *Nat. Chem. Biol.* *13*, 174–180.
- Diaz, F., Barrientos, A., and Fontanesi, F. (2009). Evaluation of the mitochondrial respiratory chain and oxidative phosphorylation system using blue native gel electrophoresis. *Curr. Protoc. Hum. Genet. Chapter 19*, Unit19.14.
- ENCODE Project Consortium (2012). An integrated encyclopedia of DNA elements in the human genome. *Nature* *489*, 57–74.
- Fernandez-Vizcarra, E., Bugiani, M., Goffrini, P., Carrara, F., Farina, L., Procopio, E., Donati, A., Uziel, G., Ferrero, I., and Zeviani, M. (2007). Impaired complex III assembly associated with BCS1L gene mutations in isolated mitochondrial encephalopathy. *Hum. Mol. Genet.* *16*, 1241–1252.
- Gibb, E.A., Vucic, E.A., Enfield, K.S., Stewart, G.L., Lonergan, K.M., Kennett, J.Y., Becker-Santos, D.D., MacAulay, C.E., Lam, S., Brown, C.J., and Lam, W.L. (2011). Human cancer long non-coding RNA transcriptomes. *PLoS ONE* *6*, e25915.
- GTE Consortium (2013). The Genotype-Tissue Expression (GTEx) project. *Nat. Genet.* *45*, 580–585.
- Guerrero-Castillo, S., Baertling, F., Kownatzki, D., Wessels, H.J., Arnold, S., Brandt, U., and Nijtmans, L. (2017). The assembly pathway of mitochondrial respiratory chain complex I. *Cell Metab.* *25*, 128–139.
- He, M., Rutledge, S.L., Kelly, D.R., Palmer, C.A., Murdoch, G., Majumder, N., Nicholls, R.D., Pei, Z., Watkins, P.A., and Vockley, J. (2007). A new genetic disorder in mitochondrial fatty acid beta-oxidation: ACAD9 deficiency. *Am. J. Hum. Genet.* *81*, 87–103.
- Heide, H., Bleier, L., Steger, M., Ackermann, J., Dröse, S., Schwamb, B., Zörnig, M., Reichert, A.S., Koch, I., Wittig, I., and Brandt, U. (2012). Complexome profiling identifies TMEM126B as a component of the mitochondrial complex I assembly complex. *Cell Metab.* *16*, 538–549.
- Jha, P., Wang, X., and Auwerx, J. (2016). Analysis of mitochondrial respiratory chain supercomplexes using blue native polyacrylamide gel electrophoresis (BN-PAGE). *Curr. Protoc. Mouse Biol.* *6*, 1–14.
- Kim, S.E., Mori, R., Komatsu, T., Chiba, T., Hayashi, H., Park, S., Sugawa, M.D., Dencher, N.A., and Shimokawa, I. (2015). Upregulation of cytochrome c oxidase subunit 6b1 (Cox6b1) and formation of mitochondrial supercomplexes: implication of Cox6b1 in the effect of calorie restriction. *Age (Dordr.)* *37*, 9787.
- Kwong, J.Q., Lu, X., Correll, R.N., Schwaneckamp, J.A., Vagnozzi, R.J., Sargent, M.A., York, A.J., Zhang, J., Bers, D.M., and Molkenkin, J.D. (2015). The mitochondrial calcium uniporter selectively matches metabolic output to acute contractile stress in the heart. *Cell Rep.* *12*, 15–22.
- Lapiente-Brun, E., Moreno-Loshuertos, R., Acín-Pérez, R., Latorre-Pellicer, A., Colás, C., Balsa, E., Perales-Clemente, E., Quirós, P.M., Calvo, E., Rodríguez-Hernández, M.A., et al. (2013). Supercomplex assembly determines electron flux in the mitochondrial electron transport chain. *Science* *340*, 1567–1570.
- Letts, J.A., Fiedorczuk, K., and Sazanov, L.A. (2016). The architecture of respiratory supercomplexes. *Nature* *537*, 644–648.
- Long, J., Badal, S.S., Ye, Z., Wang, Y., Ayanga, B.A., Galvan, D.L., Green, N.H., Chang, B.H., Overbeek, P.A., and Danesh, F.R. (2016). Long noncoding RNA Tug1 regulates mitochondrial bioenergetics in diabetic nephropathy. *J. Clin. Invest.* *126*, 4205–4218.
- Lopez-Fabuel, I., Le Douce, J., Logan, A., James, A.M., Bonvento, G., Murphy, M.P., Almeida, A., and Bolaños, J.P. (2016). Complex I assembly into supercomplexes determines differential mitochondrial ROS production in neurons and astrocytes. *Proc. Natl. Acad. Sci. USA* *113*, 13063–13068.
- Luongo, T.S., Lambert, J.P., Yuan, A., Zhang, X., Gross, P., Song, J., Shanmughapriya, S., Gao, E., Jain, M., Houser, S.R., et al. (2015). The mitochondrial calcium uniporter matches energetic supply with cardiac workload during stress and modulates permeability transition. *Cell Rep.* *12*, 23–34.
- Luongo, T.S., Lambert, J.P., Gross, P., Nwokedi, M., Lombardi, A.A., Shanmughapriya, S., Carpenter, A.C., Kolmetzky, D., Gao, E., van Berlo, J.H., et al. (2017). The mitochondrial Na<sup>+</sup>/Ca<sup>2+</sup> exchanger is essential for Ca<sup>2+</sup> homeostasis and viability. *Nature* *545*, 93–97.
- Maranzana, E., Barbero, G., Falasca, A.I., Lenaz, G., and Genova, M.L. (2013). Mitochondrial respiratory supercomplex association limits production of reactive oxygen species from complex I. *Antioxid. Redox Signal.* *19*, 1469–1480.
- Matsumoto, A., Pasut, A., Matsumoto, M., Yamashita, R., Fung, J., Monteleone, E., Saghatelian, A., Nakayama, K.I., Clohessy, J.G., and Pandolfi, P.P. (2017). mTORC1 and muscle regeneration are regulated by the LINC00961-encoded SPAR polypeptide. *Nature* *541*, 228–232.
- Michel, A.M., Fox, G., M Kiran, A., De Bo, C., O’Connor, P.B., Heaphy, S.M., Mullan, J.P., Donohue, C.A., Higgins, D.G., and Baranov, P.V. (2014). GWIPS-viz: development of a ribo-seq genome browser. *Nucleic Acids Res.* *42*, D859–D864.
- Nouws, J., Nijtmans, L., Houten, S.M., van den Brand, M., Huynen, M., Venseelaar, H., Hoefs, S., Gloerich, J., Kronick, J., Hutchin, T., et al. (2010). Acyl-CoA dehydrogenase 9 is required for the biogenesis of oxidative phosphorylation complex I. *Cell Metab.* *12*, 283–294.
- Nsiiah-Sefaa, A., and McKenzie, M. (2016). Combined defects in oxidative phosphorylation and fatty acid  $\beta$ -oxidation in mitochondrial disease. *Biosci. Rep.* *36*, e00313.

- Obayashi, T., Hayashi, S., Shibaoka, M., Saeki, M., Ohta, H., and Kinoshita, K. (2008). COXPRESdb: a database of coexpressed gene networks in mammals. *Nucleic Acids Res.* *36*, D77–D82.
- Ogilvie, I., Kennaway, N.G., and Shoubridge, E.A. (2005). A molecular chaperone for mitochondrial complex I assembly is mutated in a progressive encephalopathy. *J. Clin. Invest.* *115*, 2784–2792.
- Ostojčić, J., Panozzo, C., Lasserre, J.P., Nouet, C., Courtin, F., Blancard, C., di Rago, J.P., and Dujardin, G. (2013). The energetic state of mitochondria modulates complex III biogenesis through the ATP-dependent activity of Bcs1. *Cell Metab.* *18*, 567–577.
- Perry, C.G., Kane, D.A., Lin, C.T., Kozy, R., Cathey, B.L., Lark, D.S., Kane, C.L., Brophy, P.M., Gavin, T.P., Anderson, E.J., and Neuffer, P.D. (2011). Inhibiting myosin-ATPase reveals a dynamic range of mitochondrial respiratory control in skeletal muscle. *Biochem. J.* *437*, 215–222.
- Pfeiffer, K., Gohil, V., Stuart, R.A., Hunte, C., Brandt, U., Greenberg, M.L., and Schagger, H. (2003). Cardiolipin stabilizes respiratory chain supercomplexes. *J. Biol. Chem.* *278*, 52873–52880.
- Saada, A., Vogel, R.O., Hoefs, S.J., van den Brand, M.A., Wessels, H.J., Willems, P.H., Venselaar, H., Shaag, A., Barghuti, F., Reish, O., et al. (2009). Mutations in NDUFAF3 (C3ORF60), encoding an NDUFAF4 (C6ORF66)-interacting complex I assembly protein, cause fatal neonatal mitochondrial disease. *Am. J. Hum. Genet.* *84*, 718–727.
- Saks, V.A., Veksler, V.I., Kuznetsov, A.V., Kay, L., Sikk, P., Tiivel, T., Tranqui, L., Olivares, J., Winkler, K., Wiedemann, F., and Kunz, W.S. (1998). Permeabilized cell and skinned fiber techniques in studies of mitochondrial function in vivo. *Mol. Cell. Biochem.* *184*, 81–100.
- Souri, M., Aoyama, T., Hoganson, G., and Hashimoto, T. (1998). Very-long-chain acyl-CoA dehydrogenase subunit assembles to the dimer form on mitochondrial inner membrane. *FEBS Lett.* *426*, 187–190.
- Stroud, D.A., Surgenor, E.E., Formosa, L.E., Reljic, B., Frazier, A.E., Dibley, M.G., Osellame, L.D., Stait, T., Beilharz, T.H., Thorburn, D.R., et al. (2016). Accessory subunits are integral for assembly and function of human mitochondrial complex I. *Nature* *538*, 123–126.
- Sugiana, C., Pagliarini, D.J., McKenzie, M., Kirby, D.M., Salemi, R., Abu-Amero, K.K., Dahl, H.H., Hutchison, W.M., Vascotto, K.A., Smith, S.M., et al. (2008). Mutation of C20orf7 disrupts complex I assembly and causes lethal neonatal mitochondrial disease. *Am. J. Hum. Genet.* *83*, 468–478.
- Tsien, R.Y. (1989). Fluorescent indicators of ion concentrations. *Methods Cell Biol.* *30*, 127–156.
- Uhlén, M., Fagerberg, L., Hallström, B.M., Lindskog, C., Oksvold, P., Mardinglu, A., Sivertsson, Å., Kampf, C., Sjöstedt, E., Asplund, A., et al. (2015). Proteomics. Tissue-based map of the human proteome. *Science* *347*, 1260419.
- Uversky, V.N. (2015). The multifaceted roles of intrinsic disorder in protein complexes. *FEBS Lett.* *589* (19 Pt A), 2498–2506.
- Wang, Y., Mohsen, A.W., Mihalik, S.J., Goetzman, E.S., and Vockley, J. (2010). Evidence for physical association of mitochondrial fatty acid oxidation and oxidative phosphorylation complexes. *J. Biol. Chem.* *285*, 29834–29841.
- Wu, C., Orozco, C., Boyer, J., Leglise, M., Goodale, J., Batalov, S., Hodge, C.L., Haase, J., Janes, J., Huss, J.W., 3rd, and Su, A.I. (2009). BioGPS: an extensible and customizable portal for querying and organizing gene annotation resources. *Genome Biol.* *10*, R130.
- Yan, L.J., and Forster, M.J. (2009). Resolving mitochondrial protein complexes using nongradient blue native polyacrylamide gel electrophoresis. *Anal. Biochem.* *389*, 143–149.
- Yang, H., Wang, H., and Jaenisch, R. (2014). Generating genetically modified mice using CRISPR/Cas-mediated genome engineering. *Nat. Protoc.* *9*, 1956–1968.

## STAR★METHODS

### KEY RESOURCES TABLE

| REAGENT or RESOURCE                                                                       | SOURCE                               | IDENTIFIER                        |
|-------------------------------------------------------------------------------------------|--------------------------------------|-----------------------------------|
| <b>Antibodies</b>                                                                         |                                      |                                   |
| Rabbit polyclonal anti-Mtln                                                               | custom Proteintech                   | N/A                               |
| Mouse Cl monoclonal antibody (20E8C12)                                                    | ThermoFisher                         | Cat# A21348; RRID:AB_2535839      |
| Mouse VDAC1 monoclonal antibody (N152B/23)                                                | NeuroMab                             | Cat# 75-204; RRID: AB_2214807     |
| Rabbit anti-subunit c of the mitochondrial ATP synthase Antibody                          | a gift from Dr. Elizabeth F. Neufeld | N/A                               |
| Total OXPHOS Rodent WB Antibody Cocktail                                                  | Abcam                                | Cat# ab110413, RRID:AB_2629281    |
| Rabbit polyclonal OGDH antibody                                                           | ABclonal                             | Cat# A6391                        |
| Rabbit polyclonal ACAD9 antibody                                                          | AVIVA                                | Cat# OAAN02440                    |
| Rabbit Anti-VLCAD Polyclonal Antibody                                                     | GeneTex                              | Cat# GTX114232S, RRID:AB_10728154 |
| Rabbit Anti-SOD2 Polyclonal Antibody                                                      | a gift from Dr. Frederick E. Domann  | N/A                               |
| Rabbit Anti-Glutathione Peroxidase 1 Polyclonal Antibody                                  | Abcam                                | Cat# ab22604, RRID:AB_2112120     |
| Rabbit monoclonal Glutathione Peroxidase 4 antibody                                       | Abcam                                | Cat# ab125066, RRID:AB_10973901   |
| Rabbit anti-Beta-catenin Antibody                                                         | Sigma-Aldrich                        | Cat# PLA0230                      |
| Peroxidase-AffiniPure Goat Anti-Mouse IgG (H+L) (min X Hu,Bov,Hrs,Rb,Sw Sr Prot) antibody | Jackson ImmunoResearch Labs          | Cat# 115-035-146, RRID:AB_2307392 |
| Peroxidase-AffiniPure Goat Anti-Rabbit IgG (H+L) (min X Hu,Ms,Rat Sr Prot) antibody       | Jackson ImmunoResearch Labs          | Cat# 111-035-144, RRID:AB_2307391 |
| Mouse Anti-NDUFA9 Monoclonal Antibody, Clone 20C11                                        | Abcam                                | Cat# ab14713, RRID:AB_301431      |
| Rabbit Anti-Human LETM1 Polyclonal Antibody                                               | GeneTex                              | Cat# GTX112455, RRID:AB_1950806   |
| Rabbit polyclonal CYCS (Cytochrome C) antibody                                            | ABclonal                             | Cat# A0225                        |
| Rabbit Anti-GAPDH Polyclonal antibody                                                     | Santa Cruz Biotechnology             | Cat# sc-25778, RRID:AB_10167668   |
| Pyruvate Dehydrogenase (C54G1) Rabbit mAb antibody                                        | Cell Signaling Technology            | Cat# 3205S, RRID:AB_2162926       |
| Rabbit polyclonal DLD antibody                                                            | ABclonal                             | Cat# A13296                       |
| Goat anti-Rabbit IgG (H+L) Cross-Adsorbed Secondary Antibody, Alexa Fluor 568             | Thermo Fisher Scientific             | Cat# A-11011, RRID:AB_143157      |
| Goat anti-Mouse IgG (H+L) Highly Cross-Adsorbed Secondary Antibody, Alexa Fluor Plus 488  | Thermo Fisher Scientific             | Cat# A32723, RRID:AB_2633275      |
| Mouse Anti-FLAG Monoclonal Antibody, Clone M2                                             | Sigma-Aldrich                        | F3165 RRID:AB_259529              |
| Mouse Anti-UQCRC1 Monoclonal Antibody, Clone 16D10AD9AH5                                  | Abcam                                | Cat# ab110252 RRID: AB_10863633   |
| <b>Chemicals, Peptides, and Recombinant Proteins</b>                                      |                                      |                                   |
| Human Mtln (uniprot Q8NCU8-2) 56 amino acid protein, 96% purity by HPLC                   | Genescript                           | Custom order                      |
| MitoTracker® Red CMXRos                                                                   | Invitrogen                           | M7512                             |
| MitoSOX Red Mitochondrial Superoxide Indicator                                            | Invitrogen                           | M36008                            |
| <b>Critical Commercial Assays</b>                                                         |                                      |                                   |
| Worthington Neonatal Cardiomyocyte Isolation System                                       | Worthington Biochemical Corporation  | LK003300                          |
| Cardiolipin Beads                                                                         | Echelon Biosciences                  | P-BCLP                            |
| Control Beads                                                                             | Echelon Biosciences                  | P-B000                            |
| Lipid Strips                                                                              | Echelon Biosciences                  | P-6002                            |
| Glutathione Assay Kit                                                                     | Cayman Chemicals                     | Item 703002                       |

(Continued on next page)

**Continued**

| REAGENT or RESOURCE                                    | SOURCE                               | IDENTIFIER                                                                      |
|--------------------------------------------------------|--------------------------------------|---------------------------------------------------------------------------------|
| EnzyChrom Aconitase Assay Kit                          | BioAssay Systems                     | EACO-100                                                                        |
| Cardiolipin Assay Kit, Fluorometric                    | BioVision                            | K944-100                                                                        |
| Experimental Models: Cell Lines                        |                                      |                                                                                 |
| C2C12 myoblast                                         | ATCC                                 | CRL-1772                                                                        |
| HeLa                                                   | ATCC                                 | CCL-2                                                                           |
| Neuro-2a (N2a)                                         | ATCC                                 | CCL-131                                                                         |
| Experimental Models: Organisms/Strains                 |                                      |                                                                                 |
| Mouse: B6SJLF1/J                                       | The Jackson Laboratory               | JAX: 100012                                                                     |
| Mouse: C57BL/6J                                        |                                      | JAX: 000664                                                                     |
| Mouse: Mtn knockout mice backcrossed to C57BL/6J       | This paper                           | N/A                                                                             |
| Oligonucleotides                                       |                                      |                                                                                 |
| DNA oligonucleotides                                   | Integrated DNA Technologies (IDT)    | See Table S4                                                                    |
| Custom Dicer-substrate siRNAs targeting human Mtn      | IDT                                  | See Table S4                                                                    |
| Scrambled Dicer-substrate siRNA                        | IDT                                  | IDT #1074346                                                                    |
| Negative Control Dicer-substrate siRNA                 | IDT                                  | IDT #1074354                                                                    |
| Recombinant DNA                                        |                                      |                                                                                 |
| Multiplex Genome Engineering Using CRISPR/Cas Systems. |                                      | Addgene Plasmid #42229                                                          |
| Multiplex Genome Engineering Using CRISPR/Cas Systems. |                                      | Addgene Plasmid #42230                                                          |
| Ad5CMVcytoLacZ (Ad-βgal)                               | University of Iowa Viral Vector Core | VVC-U of Iowa-3554                                                              |
| Ad5TREnc116 (Ad-Mtn)                                   | University of Iowa Viral Vector Core | (Iowa-custom, Ad5TREnc116)                                                      |
| Ad5CMVeGFP (Ad-GFP)                                    | University of Iowa Viral Vector Core | VVC-U of Iowa-4                                                                 |
| Software and Algorithms                                |                                      |                                                                                 |
| coxpresdb ver.6                                        | NA                                   | <a href="http://coxpresdb.jp/">http://coxpresdb.jp/</a>                         |
| ToppFun gene ontology enrichment tool; ToppGene Suite  | NA                                   | <a href="https://toppgene.cchmc.org/">https://toppgene.cchmc.org/</a>           |
| RONN v3.2                                              | NA                                   | <a href="https://www.strubi.ox.ac.uk/RONN">https://www.strubi.ox.ac.uk/RONN</a> |
| IUPred                                                 | NA                                   | <a href="http://iupred.enzim.hu/">iupred.enzim.hu/</a>                          |
| PrDOS                                                  | NA                                   | <a href="http://prdos.hgc.jp/cgi-bin/top.cgi">prdos.hgc.jp/cgi-bin/top.cgi</a>  |

**CONTACT FOR REAGENT AND RESOURCE SHARING**

Further information and requests for resources and reagents should be directed to and will be fulfilled by the Lead Contact, Ryan L. Boudreau ([ryan-boudreau@uiowa.edu](mailto:ryan-boudreau@uiowa.edu)).

**EXPERIMENTAL MODEL AND SUBJECT DETAILS**

**Cultured cell lines**

Mouse C2C12 myoblast (ATCC, CRL-1772), human HeLa (ATCC, CCL-2), and mouse neuroblastoma N2a (ATCC, CCL-131) cell lines were maintained in DMEM with 100 U/ml penicillin, 0.1 mg/ml streptomycin and 10% FBS (DMEM10), in a cell culture incubator in standard conditions (37°C in 5% CO<sub>2</sub>). Cells were kept at low passage and routinely passaged prior to reaching 100% confluence.

**Rodent studies**

All animal studies were approved by the Institutional Animal Care and Use Committees (IACUC) at the University of Iowa, and all experiments conform to the appropriate regulatory standards. Rodents were housed in a controlled temperature environment on a 12 hr light/dark cycle, with food and water provided *ad libitum*, unless otherwise noted. Animal age and sex are noted within the manuscript where appropriate.

### Neonatal rat cardiomyocytes

Neonatal rat cardiomyocytes (NRCMs) were isolated using the Worthington Neonatal Cardiomyocyte Isolation System (Worthington Biochemical Corporation, Cat. No LK003300). In brief, beating hearts were removed from 6 to 12 neonatal (2–3 day old) rat pups immediately after decapitation and immersed in ice cold calcium and magnesium free Hank's Balanced Salt Solution (CMF-HBSS). Non-cardiac and atrial tissue was separated from ventricular tissue and discarded. Ventricular pieces were washed three times in CMF-HBSS, minced into  $< 1 \text{ mm}^2$  pieces, and processed through sequential treatments with trypsin (100  $\mu\text{g}/\text{mL}$ , overnight,  $4^\circ\text{C}$ ), Soybean trypsin inhibitor (182  $\mu\text{g}/\text{mL}$ , 30 min,  $37^\circ\text{C}$ ), and collagenase (1500 Units, reconstituted in Leibovitz L-15 media containing calcium and magnesium, 60 min,  $37^\circ\text{C}$ ). Cardiac cells were dispersed via trituration through a 10 mL pipette, filtered through a cell strainer (70  $\mu\text{m}$  pore size), centrifuged at  $60 \times \text{G}$  for 5 min to pellet cells, resuspended in pre-plating media (DMEM/F12 supplemented with 5% FBS, 10 mM HEPES, 1% ITS, and 15  $\mu\text{g}/\text{mL}$  Gentamycin), transferred to a 10 cm tissue culture dish, and incubated for 60 min at  $37^\circ\text{C}$  with 5%  $\text{CO}_2$ . After pre-plating, the non-adherent cell suspension containing cardiomyocytes was removed, centrifuged at  $60 \times \text{G}$  for 5 min to pellet cells, resuspended in cardiomyocyte growth media (DMEM/F12 supplemented with 5% horse serum, 10 mM HEPES, 1% ITS, 15  $\mu\text{g}/\text{mL}$  Gentamycin, and 100  $\mu\text{M}$  BRDU), counted, plated on 0.2% gelatin coated tissue culture dishes at a density of 125,000 cardiomyocytes per  $\text{cm}^2$ , and incubated at  $37^\circ\text{C}$  with 5%  $\text{CO}_2$ .

### Generation of *LINC00116/Mtln* knockout cells and mice

The CRISPR/Cas9 system was adapted using available plasmids and protocols ([crispr.mit.edu/](http://crispr.mit.edu/)). CRISPR sgRNA expression plasmids were generated to target sequences flanking the mouse *NC116* sORF homolog (*1500011K16Rik* gene), four upstream and four downstream. The 16 possible sgRNA up-down pairs were tested for activity in cultured mouse N2a cells (ATCC) by co-transfection of sgRNA plasmid pairs with a spCas9-expressing plasmid (pX260). On-target activity (i.e., cutting / sORF excision) was evaluated 48 h later by performing flanking PCR assay on genomic DNA (Figure S1; Table S4). The most efficient sgRNA pair was subsequently used to generate CRISPR/Cas9-based knockout (NC116-KO, also called *Mtln*-KO) mice via the University of Iowa Genome Editing Facility. CRISPR components for pronuclear injection were prepared using previously described methods (Yang et al., 2014). Briefly, spCas9 mRNA was *in vitro* transcribed after adding a T7 promoter to spCas9 coding region by PCR amplification of pX330 with T7-Cas9(F) and T7-Cas9(R) (Table S4). The two functional sgRNAs flanking NC116 were *in vitro* transcribed after generating templates with T7 promoters using primers T7-NC116(2) and T7-NC116(R) or primers T7-NC116(3) and T7-NC116(R). SpCas9 mRNA and sgRNAs were purified using a MEGAclear kit (Life Technologies). The injection mix consisted of 100 ng/ $\mu\text{L}$  spCas9 mRNA and 50 ng/ $\mu\text{L}$  each sgRNA. Zygotes from 4 week-old B6SJL/J mice (The Jackson Laboratory Stock: 100012) were prepared for pronuclear injection (Yang et al., 2014). Resulting offspring were genotyped to identify mice carrying the targeted *NC116* / *Mtln* deletion (Figure S1; Table S4), and the *Mtln*-KO allele was then backcrossed to the C57BL/6J strain (The Jackson Laboratory Stock: 000664) for more than three generations prior to phenotyping.

## METHOD DETAILS

### Analysis of human transcriptomic tissue expression profile data

Four independent human tissue RNA profiling datasets were analyzed to determine *LINC00116* RNA expression levels within each tissue, relative to SKM (set to 1) (Consortium and GTEx Consortium, 2013; Gibb et al., 2011; Uhlén et al., 2015; Wu et al., 2009). Within each dataset, relative expression data for similar tissues (e.g., different brain regions or segments of gut) were summarized by their mean. The mean relative expression values across datasets were then determined for tissues represented in at least three datasets, and mean  $\pm$  SEM plotted in Figure 1A.

### Bioinformatic assessment of *LINC00116* sORF and the resulting *Mtln* microprotein

DNA sequences corresponding to the *LINC00116* sORF and its homologs across various species were obtained from UCSC Genome Browser (<http://genome.ucsc.edu/>). Homologous sequences were identified using Lift-Over [or “View – In other genomes (convert)”] functions or by Blat search. DNA sequences were then input into the Translate tool (<https://web.expasy.org/>), and resulting protein sequences derived from the putative sORF were aligned using Praline (<https://www.ibi.vu.nl/programs/pralinewww/>). Further evaluations of predicted protein structure and domains were performed using various online servers and tools: Phobius (<http://phobius.sbc.su.se/>), TMHMM (<http://www.cbs.dtu.dk/services/TMHMM/>), Ronn (<https://www.strubi.ox.ac.uk/RONN>), IUPred ([iupred.enzim.hu/](http://iupred.enzim.hu/)), and PrDOS ([prdos.hgc.jp/cgi-bin/top.cgi](http://prdos.hgc.jp/cgi-bin/top.cgi)), using default settings.

### Co-expression and gene ontology enrichment analyses

Human *LINC00116* and mouse *1500011K16Rik* (*NC116* homolog) gene symbols were input into the CoXpresDB database ([coxpresdb.jp/](http://coxpresdb.jp/)), and the top 300 co-expressed genes for each species were downloaded. Gene symbols were matched across species using the NCBI HomoloGene database, and the top 200 genes, with identifiable shared gene symbols, for human and mouse were intersected (Table S1). The resulting 85 overlapping co-expressed genes were input into the ToppFun gene ontology enrichment tool (ToppGene Suite; <https://toppgene.cchmc.org/>), and the resulting significantly enriched GO terms were obtained and summarized in Table S2.

### Western blots

Tissue lysates were generated by suspending fresh-frozen tissue pieces in lysis buffer (in mM, 150 NaCl, 10 NaF, 5 EGTA, 5 EDTA, 50 Tris-HCL pH 7.5 with 1.0% Triton X-100, 0.5% deoxycholate and 0.1% SDS) with freshly added 1X protease inhibitor (Roche), 1mM phenylmethylsulfonyl fluoride (PMSF), and 1mM sodium orthovanadate, and shaking in a TissueLyser (QIAGEN). After 20 min on ice, lysates were clarified by centrifugation for 10 min 10,000 × G at 4°C. For adipose tissues, an upper layer of fat formed upon centrifugation, and the intranatant was collected and subjected to up to 3 additional clarification steps. Protein concentration was measured in clarified lysates using a BCA Protein Assay kit (ThermoFisher) and proteins were resolved by standard SDS-PAGE (Invitrogen NuPAGE system) before being transferred to a 0.2 μm PVDF membrane (Millipore) using NuPAGE transfer buffer (Invitrogen). The membrane was blocked with 2%–5% milk in 1X TBST (0.1% Tween 20), after which anti-Mtn antibody (1:2000; custom Proteintech, see Figure 1C), anti-Cox4 (1:3000, ThermoFisher, A21348), anti-VDAC1 (1:4000, NeuroMab, 75-204), anti-subunit c of the mitochondrial ATP synthase (1:3000, a gift from Dr. Elizabeth F. Neufeld), anti-OXPHOS cocktail (1:1000, Abcam, ab110413), anti-OGDH (1:2000, ABclonal, A6391), anti-ACAD9 (1:4000, AVIVA, OAA02440), anti-VLCAD (1:2000, GeneTex, GTX114232), anti-SOD2 antibody (1:1000, a gift from Dr. Frederick E. Domann), anti-GPX1 antibody (1:1000, ab22604, Abcam), anti-GPX4 antibody (1:1000, ab125066, Abcam), anti-β-catenin (1:2000; Sigma-Aldrich, PLA0230), anti-DLD (ABclonal A13296), or anti-PDHA1 (CST 3205S), diluted in blocking buffer was added and incubated overnight at 4°C with rocking. Membranes were washed with 1X TBST, incubated for 1 h with HRP-conjugated goat anti-mouse or anti-rabbit antibody (Jackson ImmunoResearch, 115-035-146 and 111-035-144) diluted 1:50,000 in blocking buffer, and then washed again. Chemiluminescence detection was performed using West Femto Maximum Sensitivity Substrate (ThermoFisher) followed by imaging on a BioRad Versadoc (Quantity One software used for acquisition and densitometry analyses).

### Plasmids and viral constructs

Human and mouse *NC116* sORFs (Mtn) were PCR amplified from genomic DNA using primers with added restriction enzyme sites and subsequently cloned into viral-based CMV or TRE (tetracycline/doxycycline-inducible) expression plasmids (University of Iowa Viral Vector Core). Primers designed to add a C-terminal FLAG epitope were also used, as well as reverse primers that omit the stop codon, for downstream fusion to an eGFP cassette in custom CMV-based expression plasmids. Primer sequences are provided in Table S4. Replication incompetent adenoviral vectors including Ad-βgal (Iowa-3554, Ad5CMVcytoLacZ), Ad-GFP (Iowa-4, Ad5CMVeGFP), Ad-Mtn (Iowa-custom, Ad5TREnc116) were generated at the University of Iowa Viral Vector Core using the RapAd system (Anderson et al., 2000).

### NRCM transfection, staining, and imaging

NRCMs were transfected with various human Mtn expression plasmids (wild-type, C-terminal GFP-tagged, and N- or C-terminal FLAG tagged) using Lipofectamine 2000 (Invitrogen) or infected with Ad-Mtn (as described below). Transfection complexes were formed at a weight:volume ratio (wt:v) of 100–200 ng plasmid DNA to 1 μL Lipofectamine 2000 in 50 μL OPTIMEM, then diluted 4-fold in OPTIMEM and overlaid onto cells at 100 μL per cm<sup>2</sup> after suctioning off the culture media. After 4 h incubation at 37°C with 5% CO<sub>2</sub>, the transfection media was replaced with cardiomyocyte growth media at a volume of 250 μL per cm<sup>2</sup>. The cells were incubated for 24–48 h at 37°C with 5% CO<sub>2</sub> with daily media exchanges before visualization of Mtn localization by fluorescent microscopy and immunocytochemistry.

Mitochondria were labeled in live cells (non-transfected or 2 days post transfection or transduction, see below) by incubation with 100 nM MitoTrackerRed (Invitrogen) in pre-warmed media for 45 min at 37°C with 5% CO<sub>2</sub>. MitoTracker media was removed and cells washed 3X with culture media, prior to fixation with 4% paraformaldehyde in culture media for 10 min at 37°C. For immunofluorescent staining, fixed cells were washed with HBSS, permeabilized with 0.2% Triton X-100 for 15 min at RT, blocked in 2% BSA/HBSS for 1 h at RT, and incubated with primary antibodies diluted in 0.2% BSA/HBSS, overnight at 4°C with rocking. Primary antibody was rabbit anti-Mtn (1:500, custom Proteintech) or anti-FLAG mouse monoclonal antibody (clone M2, Sigma-Aldrich). Cells were washed in HBSS and stained with Alexa568-conjugated goat anti-rabbit or goat anti-mouse IgG at 1:2000 for 1 h at RT. After subsequent HBSS washes, image acquisition and analysis was done using a confocal laser scanning microscope (Zeiss LSM 510 meta) with the Zeiss ZEN software.

### Mitochondrial isolations

For mitochondrial isolation from cultured cells, cells were harvested by trypsinization, washed in DMEM10, and crude mitochondria were isolated according to previously published methods (Clayton and Shadel, 2014), scaled down for 2 × 10<sup>7</sup> to 6 × 10<sup>7</sup> cells using a 2 mL Dounce homogenizer with tight fitting B pestle (Kontes), and with inclusion of 1x protease inhibitor cocktail in buffers. For C2C12 cells a sampling of pre-disrupted cells (input) and the supernatant above the crude mitochondrial pellet (sup) were collected for immunoblot analysis. Samples were analyzed on the day of isolation or stored at –80°C.

For mitochondrial isolation from tissues, tissues were dissected from mice under deep anesthesia, or immediately after euthanasia, and snap frozen in liquid nitrogen. Mitochondria were isolated by tissue disruption, homogenization, and differential centrifugation. Reagents, tubes and instruments were cold, tissue processing was performed on ice, and centrifugations were done at 4°C. Briefly, quadriceps, soleus, and gastrocnemius muscle from one mouse leg were minced together in isolation buffer for mitochondria-1 (IBM1) containing (in mM) 67 sucrose, 50 KCL, 10 EDTA, 50 Tris-HCL, and 0.2% fatty acid free BSA, pH 7.4 at 4°C. minced tissue



was pelleted by 3 min centrifugation at 800 × G, digested for 30 min on ice in 1.5 mL 0.5% trypsin (Sigma T0303) in IBM1, transferred to an 8 mL Potter Elvehjem tissue grinder with PTFE Pestle (Kimble 886000-022) with 4.5 mL of IBM1 and freshly added HALT protease inhibitor cocktail (Invitrogen) or Complete protease inhibitor cocktail (Roche), and homogenized manually with 6 strokes. After pelleting debris at 800 × G for 10 min the supernatant was transferred to a glass tube (Kimble HS) and centrifuged at 8000 × G for 10 min to obtain the mitochondrial pellet. The supernatant was poured off and the pellet suspended in IBM2 (in mM, 200 D-mannitol, 70 sucrose, 10 Tris-HCL, 5 EGTA, pH 7.4 at 4°C), transferred to a 2 mL eppendorf tube and washed twice in IBM2 by centrifugation for 10 min at 9000 × G. A sample of resuspended mitochondria was lysed in 1% Triton X-100 and protein concentration determined by DC (BioRad) or BCA (ThermoScientific) protein assay. Mitochondrial pellets were assayed on the same day or stored at –80. Cardiac mitochondria were isolated from the 1/3 to 1/2 of the mouse heart (posterior portion with atria removed). Mitochondrial isolation from heart was similar to that used for SKM except for modifications to buffers IBM1 (in mM, 200 sucrose, 10 Tris-HCL, 1 EGTA, 0.2% fatty acid free BSA, pH 7.4 at 4°C) and IBM2 (in mM, 200 D-mannitol, 75 sucrose, 10 Tris-HCL, 1 EGTA, pH 7.4 at 4°C), and trypsin digestion time reduced to 15 min.

### Graded digitonin extraction of the outer mitochondrial membrane proteins

Crude mitochondria (isolated from SKM as described above and stored at –80°C) were suspended in IBM2 with protease inhibitors and divided into 4 equal parts (each approximately 150 μg mitochondrial protein in 100 μl) and incubated with increasing concentrations of digitonin (high purity digitonin, Millipore Cat #300410; at 0, 0.015, 0.05, or 0.15%) for 15 min on ice with intermittent vortexing, then centrifuged for 10 min 10,000 × G at 4°C to separate the supernatant containing extracted mitochondrial proteins, from pellets containing residual mitochondria and mitoplasts. Supernatants were transferred to fresh tubes and NuPAGE loading buffer (4X LDS and 10X reducing agent) was added to 1X. Pellets were suspended in 75 μL IBM2 with 1X NuPAGE loading buffer. Samples were heated to 70°C for 10 min, and 10 μL per well loaded onto precast NuPAGE 4%–12% Bis-Tris 15-well gels. SDS-PAGE and electrotransfer to 0.2 μm PVDF membranes were performed using standard procedures with NuPAGE buffers (Invitrogen). After transfer, immunoblotting and chemiluminescent development were performed using standard procedures as described above. Primary antibodies (listed above) were anti-Vdac1 (OMM), anti-Cox4 (IMM) and anti-Mtln (all at 1:2000) and anti-GAPDH (1:3000).

### Mitochondrial protein topology assessment with Proteinase K

Mitochondria were isolated from WT mouse SKM (combined quadriceps, gastrocnemius and tibialis) as described elsewhere in Methods, resuspended in isolation buffer and divided into 6 tubes (approximately 200 μg mitochondrial protein per tube), pelleted at 9000xg for 10 min then resuspended in 100 μl of either isotonic buffer (isolation buffer), hypotonic buffer (5 mM HEPES adjusted to pH 7.4 with KOH), or isotonic buffer containing 0.25% Triton X-100, with all steps performed on ice. After resuspension, each tube received either 4 μl water or 4 μl freshly prepared proteinase K (recombinant proteinase K, SKU pack 3115836001, Sigma-Aldrich) for a final concentration of 80 μg/ml. Tubes were incubated at 4°C for 30 min with gently mixing every 5 min. After the digest step, proteins were precipitated by addition of 100% trichloroacetic acid (TCA) to a final 10% volume and incubation on ice for 30 min. TCA precipitates were pelleted by centrifugation for 10 min at 14,000 × g at 4°C. Supernatants were discarded and pellets were washed twice by resuspension in 500 μl ice-cold acetone and centrifugation at 14,000 × g at 4°C. Pellets were allowed to air dry at room temperature in a fume hood for 45 min, then another 5 min at 95°C before addition of 2X NuPAGE loading buffer. Pellets were resuspended by pipetting, denatured at 95°C for 10 min, then 15 μl loaded per lane in 4%–12% bis-tris NuPage gels. SDS-PAGE was run in MES buffer and proteins were transferred to PVDF, membranes blocked, probed with primaries (overnight at 4°C) and developed as described elsewhere in Methods.

Membranes were immunoblotted with antibodies directed to antigens representative of different mitochondrial compartments. Oxoglutarate dehydrogenase (OGDH) is a soluble matrix protein. Letm1 is a single-pass IMM protein with the c-terminus oriented in the matrix (the antibody used recognizes c-terminus). Cytochrome c is a soluble protein in the intermembrane space (IMS). In this assay, hypotonic shock selectively disrupts the OMM allowing proteinase K access to the IMS, while the IMM remains intact.

### Cardiolipin binding assay

Hearts from Mtln-KO mice or wild-type (WT) littermates were lysed in NP-40 lysis buffer [1% NP-40, 25 mM HEPES (pH 7.5), 50 mM NaCl, 10 mM NaF, 5 mM EDTA, 1 mM sodium orthovanadate, 1 mM PMSF, proteinase and phosphatase inhibitor cocktails]. Insoluble material was removed by centrifugation at 10,000 × G for 10 min at 4°C. Protein concentration was measured in the cleared supernatant by BCA assay. Cardiolipin-bound agarose beads and control beads (Echelon) were incubated with 500 μg of mouse heart lysates for 2 h at 4°C, followed by 5 washes in 10 mM HEPES, 150 mM NaCl and 0.25% (v/v) NP-40. To elute proteins, an equal volume of 2X NuPAGE loading buffer (with LDS and reducing agent) was added to beads, incubated for 10 min at 70°C, and eluates were subjected to standard SDS-PAGE and western blotting.

### Protein lipid strip binding assay

A protein-lipid overlay assay was performed using Membrane Lipid Strips (P-6002; Echelon Biosciences) according to the manufacturer's recommendations. Briefly, The strips were first blocked in 1% (w/v) non-fat milk in TBST (50 mM Tris-HCl (pH 8.0), 150 mM NaCl, and 0.1% (v/v) Tween 20) for 1 h at room temperature in the dark, followed by 1 h incubation with synthetic NC116 protein (Genscript) at 0.5 μg/ml in blocking buffer at room temperature with gentle agitation. After washing the membranes three times

for 10 min each with TBST, they were incubated for 2 hr with rabbit anti-NC116 polyclonal Ab (1:2000; custom from Proteintech). Membranes were washed as before and incubated for 1 h with anti-rabbit-HRP conjugated antibody (1:100,000; Jackson ImmunoResearch Laboratories) followed by three TBST washes and detection of lipid-bound protein by ECL.

### Transduction of cells with adenovirus vectors

For Mtn overexpression experiments, HeLa cells were grown to approximately 60% confluency in DMEM10 at 37°C in 5% CO<sub>2</sub>, media was removed and Ad-βgal or Ad-Mtn diluted in OPTIMEM was added to cells at a multiplicity of infection of approximately 3–8 PFU per cell. After 4–5 h incubation, the vector solution was replaced with DMEM10 with or without doxycycline (+/–DOX, 0.5 μg/ml) to induce Mtn transgene expression. At 48 h to 72 h post-transduction, cells were immunostained or harvested for mitochondria isolation. Treatment groups include Ad-βgal (+DOX), Ad-Mtn (–DOX), and Ad-Mtn (+DOX).

### Evaluation of mitochondrial calcium ( $mCa^{2+}$ ) retention capacity and matrix free- $Ca^{2+}$ content

To evaluate  $mCa^{2+}$  retention capacity and content, HeLa cells from all groups including Ad-βgal (+DOX), Ad-Mtn (–DOX), and Ad-Mtn (+DOX), were transferred to an intracellular-like  $Ca^{2+}$  free buffer medium containing (in mM) 120 KCl, 10 NaCl, 1 KH<sub>2</sub>PO<sub>4</sub>, 20 HEPES-Tris and 3 μM thapsigargin to inhibit sarcoplasmic/endoplasmic reticulum calcium ATPases (SERCA) so that the movement of  $Ca^{2+}$  was only influenced by mitochondrial uptake, 80 μg/ml digitonin, protease inhibitors (Sigma EGTA-Free Cocktail), supplemented with 10 μM succinate and pH to 7.2. All solutions were cleared with Chelex 100 to remove trace  $Ca^{2+}$  (Sigma). For  $mCa^{2+}$  retention capacity:  $3 \times 10^6$  digitonin-permeabilized HeLa cells were loaded with the ratiometric reporters FuraFF at concentration of 1 μM ( $Ca^{2+}$ ). At 20 s JC-1 (Enzo Life Sciences) was added to monitor mitochondrial membrane potential ( $\Delta\psi_m$ ). Fluorescent signals were monitored in a spectrofluorometer (Delta RAM, Photon Technology Int.) at 340 and 380 ex/510 em. After acquiring baseline recordings, at 400 s, a repetitive series of  $Ca^{2+}$  boluses (10 μM) were added at the indicated time points. At completion of the experiment the protonophore, 10 μM FCCP, was added to uncouple the  $\Delta\psi_m$  and release matrix free- $Ca^{2+}$ . All experiments (3 replicates) were conducted at 37°C. All details have been previously reported (Luongo et al., 2017). For  $mCa^{2+}$  content, cells from all the groups were loaded with Fura2 and treated with digitonin and thapsigargin as previously reported (Luongo et al., 2017; Luongo et al., 2015). Upon reaching a steady-state recording, the protonophore, FCCP, was used to collapse  $\Delta\Psi$  and initiate the release of all matrix free  $Ca^{2+}$ .

### Measurement of mitochondrial membrane potential ( $\Delta\Psi_m$ ) and ROS in cells

To assess mitochondrial membrane potential, HeLa cells from groups Ad-βgal (+DOX), Ad-Mtn (–DOX), and Ad-Mtn (+DOX) were stained with the  $\Delta\Psi_m$  indicator tetramethylrhodamine, methyl ester (TMRM; 100 nM) for 30 min at 37°C. Image acquisition was performed using a Carl Zeiss Axio Observer Z1 confocal microscope at 572/35 ex and 632/60 em. To measure mitochondrial superoxide production, cells were loaded with 5 μM MitoSOX Red for 30 min at 37°C and imaged at 545/30 ex and 585/40 em. Changes in fluorescence intensity was quantified using ImageJ as described (Luongo et al., 2017; Luongo et al., 2015).

### Oxygen consumption rate measures in cells

HeLa cells infected with adenovirus including Ad-βgal (+DOX), Ad-Mtn (–DOX) and Ad-Mtn (+DOX) were subjected to oxygen consumption rate (OCR) measurements at 37°C in an XF96 extracellular flux analyzer (Seahorse Bioscience). Cells ( $3 \times 10^4$ ) were plated in XF media pH 7.4 supplemented with 25 mM glucose and 1 mM sodium pyruvate and sequentially exposed to oligomycin (2 μM), FCCP (2.5 μM), and rotenone plus antimycin A (1 μM each) as previously reported (Luongo et al., 2015).

### Determination of mitochondrial and nuclear DNA contents

HeLa cells seeded in 24-well plates were infected with Ad virus as described above, and cells were treated with or without DOX for 48 h before DNA extraction in 100 μL QuickExtract DNA Extraction buffer (Epicenter Biosciences) per manufacturer instructions. Samples were diluted 1:4 and then serially diluted 1:5 Range (1–4, 1–20, 1–100, 1–500, 1–2500, 1–12500, 1–62500, 1–312500) before quantitative PCR analysis using primers specific for genomic DNA (*LINC00116* locus) or mitochondrial DNA (see Table S4 for primer sequences), a Vii7 384-well plate QPCR machine and Power SYBR Green Master Mix (Thermo Fischer). We selected dilutions that showed a linear amplification between cycles 20 – 30, which corresponded to genomic DNA at dilutions a 1:20 – 1: 100, and mitochondria 1:12500 – 1:62500. Technical triplicates were performed to determine mean Ct per sample, and group means were calculated (n = 8 per group).

To determine mitochondrial DNA content in WT and Mtn-KO mouse muscles, gastrocnemius muscles were harvested from n = 7 mice per genotype, snap frozen in liquid nitrogen, and crushed into powder. DNA was extracted from approximately 5–10 mg of tissue powder after digestion with Proteinase K (0.2 mg/mL) overnight at 56°C. Sample were subsequently heated for 45 mins at 85°C, centrifuged to remove debris and then supernatants were removed for further DNA isolation by standard isopropanol precipitation. DNA was resuspended in TE buffer and concentrations determined via Nanodrop spectrophotometry. DNA samples were diluted to a standard concentration before serially diluting each 1:5 over range (1–5, 1–25, 1–125, 1–625, 1–3125, 1–15625, 1–78125) before QPCR analysis using primers specific for genomic DNA (*TCRD* locus) or mitochondrial DNA (Table S4). We selected dilutions that showed a linear amplification between cycles 20 – 30, which corresponded to genomic DNA at dilutions a 1:5 – 1: 125, and mitochondria 1:3125 – 1:78125. Technical triplicates were performed to determine mean Ct per sample, and group means were calculated (n = 7 per genotype).

### Preparation of permeabilized cardiac and skeletal myofibers

This technique has been described by our group (Anderson et al., 2007) and others (Saks et al., 1998) in detail. Following dissection, muscle samples were placed in ice-cold (4°C) Buffer X containing (in mM) 7.23 K<sub>2</sub>EGTA, 2.77 CaK<sub>2</sub>EGTA, 20 Imidazole, 20 Taurine, 5.7 ATP, 14.3 Phosphocreatine, 6.56 MgCl<sub>2</sub>·6H<sub>2</sub>O and 50 MES (pH 7.1, 295 mOsm). Under a dissecting microscope, fat and connective tissue were removed from muscle samples and then small bundles of fibers were prepared (~1–3.5 mg wet weight/fiber bundle). Fiber bundles were then treated with 50 µg/ml saponin for 30 min as previously described (Anderson and Neuffer, 2006). Following permeabilization, myofiber bundles (PmFBs) were washed in ice-cold Buffer Z containing (in mM) 110 K-MES, 35 KCl, 1 EGTA, 5 K<sub>2</sub>HPO<sub>4</sub>, 3 MgCl<sub>2</sub>·6H<sub>2</sub>O, and 5 mg/ml BSA (pH 7.4, 295 mOsm) and remained in Buffer Z on a rotator at 4°C until analysis (< 4 hr). We have observed that PmFBs undergo a Ca<sup>2+</sup>-independent contraction that is temperature sensitive and can occur even at 4°C (Perry et al., 2011), therefore, 20 µM Blebbistatin was added to the wash buffer and to the respiration medium during experiments, to prevent contraction. Chemicals and reagents used for OCR and calcium measures (see below) in myofibers were all obtained from Sigma-Aldrich, except for Amplex Red and Calcium Green 5-N, which were obtained from Invitrogen.

### Measurement of mitochondrial O<sub>2</sub> consumption (mO<sub>2</sub>) and Ca<sup>2+</sup> retention capacity in permeabilized cardiac and skeletal myofibers

All mitochondrial measurements were performed at 37°C and contained 20 µM Blebbistatin in the assay buffer to prevent contraction during the course of the experiments. The Oroboros O<sub>2</sub>K Oxygraph system (Oroboros Instruments, Innsbruck, Austria) was used for O<sub>2</sub> consumption (*J*O<sub>2</sub>) measurements. Ca<sup>2+</sup> measurements were performed in a spectrofluorometer (Photon Technology Instruments, Birmingham, NJ), equipped with a thermal-jacketed cuvette chamber. The *J*O<sub>2</sub> experiments were performed in Buffer Z + 0.5 mg/ml BSA, with the exception of Ca<sup>2+</sup> retention experiments, which were performed in Buffer Y, containing (in mM) 250 Sucrose, 10 Tris-HCl, 20 Tris base, 10 KH<sub>2</sub>PO<sub>4</sub>, 2 MgCl<sub>2</sub>·6H<sub>2</sub>O, 0.5 mg/ml BSA. During the course of the *J*O<sub>2</sub> experiments, substrates, nucleotides, and respiratory inhibitors were provided as indicated in the Figures and legends. For mitochondrial Ca<sup>2+</sup> retention measurements, Buffer Z (or Y for SKM fibers) contained 1 µM Calcium Green 5-N (Invitrogen) and 5 mM pyruvate, 2 mM malate, and 5 mM succinate. At start of Ca<sup>2+</sup> retention experiments, 1 µM Thapsigargin was added to inhibit endogenous SERCA in the myofibers, and 50 µM EGTA added to chelate residual Ca<sup>2+</sup> and to establish F<sub>min</sub>. Pulses of 120 nmols Ca<sup>2+</sup> (CaCl<sub>2</sub>) were added at fixed time intervals and Ca<sup>2+</sup> uptake followed until mPTP opening as in (Anderson et al., 2011). At the end of experiment, 5 mM CaCl<sub>2</sub> was added to saturate the probe and establish F<sub>max</sub>. Changes in free Ca<sup>2+</sup> in cuvette during mCa<sup>2+</sup> uptake were then calculated using the known K<sub>d</sub> for Calcium Green 5-N and the equations established by Tsien's group for calculating free ion concentrations using ion-sensitive fluorophores (Tsien, 1989). Prior to or following each experiment, fiber bundles were blot dried on wax paper and weighed on a microbalance. Data are expressed as nmol·min<sup>-1</sup>·mg dry wt.<sup>-1</sup> (*J*O<sub>2</sub>) or nmol·mg dry wt.<sup>-1</sup> (Ca<sup>2+</sup> retention).

### Exercise tolerance testing

Exercise tolerance testing was conducted using a multilane motor-driven treadmill (Columbus Instruments, Model Exer 3/6 Treadmill) equipped with a wire grid at the end the tread belt that delivers a mild electric shock when mice cease running or cannot maintain the speed of the belt. The shock grid was set to deliver a shock (0.2 mA at 2 Hz) to motivate running. Time to exercise intolerance (i.e., failure to run) is the experimental endpoint defined as the mouse remaining on the shock grid for 10 s despite shock motivation. Mice were watched continuously during testing and were removed from the test at the time of failure. Wild-type and Mtn-KO mice were subjected to two different protocols designed to measure “sprint” or “endurance” capacity.

Exercise tolerance on the sprint protocol was performed as previously described (Kwong et al., 2015). Mice were not acclimatized to the treadmill prior to the day of the test. On the test day, mice were placed on the stationary treadmill for five min, then the treadmill was started at a speed of 10 m/min for one min, and then increased to a speed of 15 m/min for one min. The clock is started after this 7 min acclimation/warm-up period and the treadmill speed is increased to 20 m/min for a maximum run time of 20 min.

For exercise tolerance on the gradual acceleration (i.e., “endurance”) protocol, mice were acclimatized to the treadmill during a two day training period and then the test was done on day 3. On training day one, mice were placed on the treadmill at a starting speed of 3 m per min (m/min) and an incline of 15°. The treadmill speed was increased to 5 m/min after 5 min, increased to 7 m/min after 10 min, and stopped after 15 min. On training day two, mice were placed on the treadmill at a starting speed of 3 m per min (m/min) and an incline of 15°. The treadmill speed was increased to 5 m/min after 5 min, increased to 7 m/min after 10 min, increased to 10 m/min after 15 min, and stopped after 18 min. For “endurance” testing on day three, mice were placed on the treadmill at a starting speed of 5.5 m per min (m/min) and an incline of 0°. At 3 min intervals either the speed or incline was increased stepwise. Incline started at 0° and was increased to 5° after 3 min, 10° after 6 min, and 15° after 12 min for the duration. Speed started at 5.5 m/min and was increased to 7 m/min after 9 min, 9 m/min after 15 min, and increased an addition 1 m/min up to 22 m/min at every 3 min interval for duration.

### Biochemical assays of oxidative stress

Biochemical assays were performed in isolated mitochondria or whole tissue lysates. The GSH/GSSG levels were measured on whole-tissue lysates with a commercially available kit (Cayman Chemical). The aconitase enzyme activity was measured in isolated mitochondria with an Aconitase Assay Kit (BioAssay Systems), and Cardiolipin level was measured with a Cardiolipin Assay Kit (BioVision) according to manufacturer's instructions.

### Blue native gel electrophoresis (BNGE), blotting, Coomassie stain, and in-gel activity (IGA)

BNGE procedures were derived from published methods (Diaz et al., 2009; Jha et al., 2016). Mitochondrial pellets were resuspended in aminocaproic acid buffer (ACAB, 0.75 M 6-aminocaproic acid, 50 mM bis-tris, pH 7.0) with freshly added protease inhibitors. Digitonin (high purity, Millipore) was added from a 10% stock in water to give a 4 g:g ratio of digitonin to mitochondrial protein and samples were solubilized on ice for 20 min, then centrifuged for 30 min at 20,000 × G and 4°C. Supernatants were transferred to fresh tubes and coomassie brilliant blue G (CBBG, Sigma B0770) was added from a 5% stock to give a 4 g:g digitonin:CBBG ratio. Glycerol was added to a final 5% volume, and 10–20 μL of sample containing 10–70 μg of protein were loaded into wells of precast NativePAGE Novex® 3%–12% Bis-Tris 10-well Gels (Invitrogen). High molecular weight (HMW) native markers (GE Healthcare) reconstituted in 100 μL ACAB plus protease inhibitors and 10 μL 5% CBBG, were loaded at 10–15 μL per lane. BNGE was run in an Invitrogen Novex mini-Cell tank in a 4°C cold room. Cathode buffer (15 mM bis-tris, 50 mM tricine,) and anode buffer (50 mM bis-tris) were pH 7.0 at 4°C. CBBG was added to the cathode buffer to a final 0.02% (dark blue) or 0.0005% (light blue). Electrophoresis was initiated at constant 150V with dark blue cathode buffer, and after approximately 50 min the dark blue was replaced with light blue cathode buffer and electrophoresis resumed at 250V for a maximum of 3 h total running time (until the dye front began to run into the anode buffer). Gels were transferred to 0.2 μm PVDF membrane using the Invitrogen mini Blot Module and NuPAGE transfer buffer at 4°C at 20V for 2–5 h. After transfer, membranes were fixed for 10 min in 8% acetic acid, rinsed in water and air-dried. Membranes were re-wet in methanol and washed in several changes of methanol to remove most of the CBBG, equilibrated in water, blocked with 5% milk (skim milk powder) in PBS-0.05% tween (PBST), then incubated with primary antibody diluted in PBST with 2.5% milk overnight at 4°C on a rocker. Primary antibodies were anti-Mtln (1/2000–1/3000, custom antibody) anti-NDUFA9 (1/5000 Abcam ab14713), anti-UQCRC1 (1/5000 Abcam ab110252), anti-OGDH (1/2000), anti-DLD (1/2000), anti-ACAD9 (1/4000). Blots were washed in PBST and incubated with HRP-conjugated secondary antibody from goat (1:50,000 to 1:100,000), washed and developed using ECL-prime (GE Healthcare) or SuperSignal Femto (ThermoScientific) western blot developing reagent, and chemiluminescent images captured on a VersaDoc Imaging system with Quantity One software (Bio-Rad). For some experiments, the PVDF was incubated for 15 min in 2%–4% SDS in PBST with or without 4% beta-mercaptoethanol before blocking, to enhance primary antibody binding.

For Coomassie staining after BNGE, gels were immersed in stain (0.5% CBBG in 50% methanol, 10% acetic acid) on a rocker for 5 min, rinsed several times in MilliQ water, destained in 40% methanol / 10% acetic acid with rocking for 3 exchanges of destain every 15 min. Destaining was continued overnight in MilliQ water.

For IGA staining, BNGE conditions were similar to that described above except anode and cathode buffers were ice-cold and the gel box was packed in ice during the run, the starting cathode buffer contained 0.002% CBBG and was replaced after 50 min with cathode buffer without CBBG. Oxphos CI IGA staining was performed immediately after BNGE, as described (Jha et al., 2016). Briefly, the gel was incubated in freshly prepared CI substrate solution (2 mM Tris-HCl pH 7.4, 0.1 mg/ml NADH (Sigma-Aldrich), 2.5 mg/ml Nitrotetrazolium Blue chloride (NTB, Sigma-Aldrich)) for 20–30 min on a rocker at room temperature. Appearance of violet bands indicated CI activity. Reaction was stopped by incubation in 10% of acetic acid for 10 min and the gel was then washed in water.

Scanned images were obtained for PVDF after BNGE (before blotting), Coomassie stained gels, and IGA stained gels on an Epson Perfection V550 Photo scanner.

### QUANTIFICATION AND STATISTICAL ANALYSES

Statistical analyses were performed using Prism GraphPad software, with guidance from the University of Iowa Department of Biostatistics (Dr. Patrick Breheny). GraphPad was used to generate plots and to perform two-tailed t tests or one-way ANOVAs with Dunnett's post hoc to obtain the reported p values. The specific statistical tests for each experiment are indicated throughout the manuscript; for each, all data met the test assumptions and groups showed similar variance. Results were considered to be significant if p values were  $\leq 0.05$ .

**Cell Reports, Volume 23**

**Supplemental Information**

**Mitoregulin: A lncRNA-Encoded**

**Microprotein that Supports Mitochondrial**

**Supercomplexes and Respiratory Efficiency**

**Colleen S. Stein, Pooja Jadiya, Xiaoming Zhang, Jared M. McLendon, Gabrielle M. Abouassaly, Nathan H. Witmer, Ethan J. Anderson, John W. Elrod, and Ryan L. Boudreau**

## SUPPLEMENTAL INFORMATION

### Mitregulin: a lncRNA-encoded microprotein that supports mitochondrial supercomplexes and respiratory efficiency

Colleen S. Stein, Pooja Jadiya, Xiaoming Zhang, Jared M. McLendon, Gabrielle M. Abouassaly, Nathan H. Witmer, Ethan J. Anderson, John W. Elrod, and Ryan L. Boudreau\*

Supplemental information inventory:

|                  |                                                                                                                                             |
|------------------|---------------------------------------------------------------------------------------------------------------------------------------------|
| <b>Figure S1</b> | Generation of LINC00116 (NC116) homolog (1500011K16Rik) knockout mice. Related to Figure 2 and Figure 5.                                    |
| <b>Figure S2</b> | Intracellular localization of FLAG-tagged Mtn proteins. Related to Figure 2.                                                                |
| <b>Figure S3</b> | Metabolic phenotyping data from HeLa cells overexpressing Mtn. Related to Figure 3.                                                         |
| <b>Figure S4</b> | Mitochondrial DNA and cardiolipin content in Mtn-overexpressing HeLa cells and Mtn-KO mouse muscle tissues. Related to Figures 2-5.         |
| <b>Figure S5</b> | Exercise tolerance testing and myofiber respiration measures in wild-type and Mtn-KO mice. Related to Figure 5.                             |
| <b>Figure S6</b> | Evaluation of oxidative stress readouts in wild-type and Mtn-KO mouse muscle tissues. Related to Figure 5.                                  |
| <b>Figure S7</b> | Respiratory chain complex levels and Mtn distribution in wild-type and Mtn-KO mouse heart and skeletal muscle tissues. Related to Figure 5. |
| <b>Figure S8</b> | Complex I in-gel activity assay on wild-type and Mtn-KO muscle tissues. Related to Figure 5.                                                |
| <b>Figure S9</b> | Expression of TCA and FAO pathway enzymes in wild-type and Mtn-KO mouse hearts. Related to Figure 5.                                        |
| <b>Table S1</b>  | Top genes co-expressed with human <i>LINC00116</i> and mouse <i>15000iiK16Rik</i> . Related to Figure 1.                                    |
| <b>Table S2</b>  | Gene ontology enrichment analysis on overlapping human and mouse LINC00116 co-expressed genes Related to Figure 1.                          |
| <b>Table S3</b>  | Summary and annotation of shared human and mouse <i>LINC00116</i> co-expressed genes. Related to Figure 1.                                  |
| <b>Table S4</b>  | DNA and siRNA oligonucleotide sequences                                                                                                     |

Figure S1

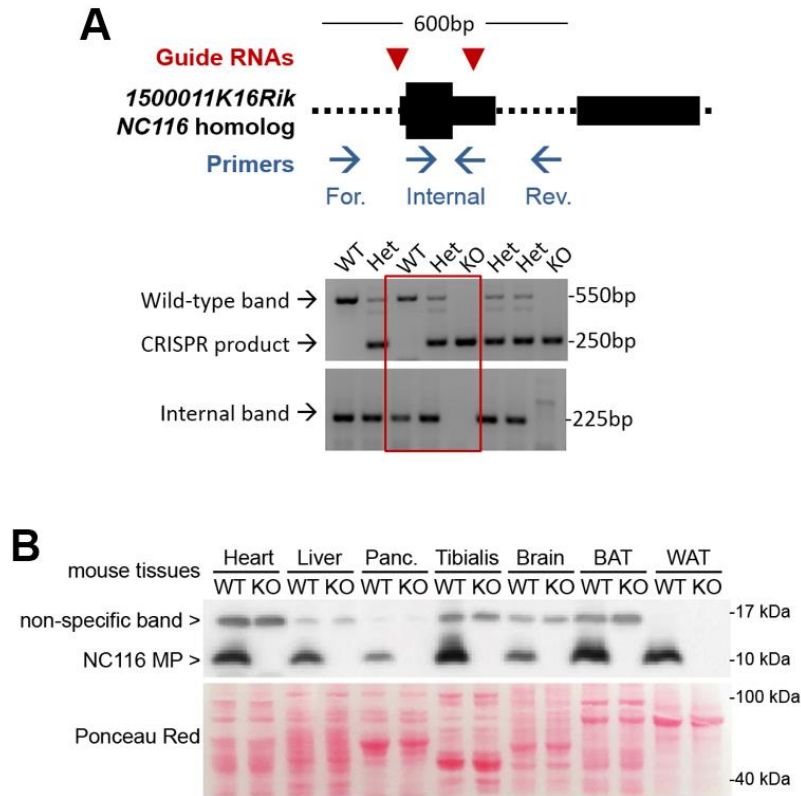

**Figure S1. Generation of *LINC00116* (*NC116*) homolog (*1500011K16Rik*) knockout mice. Related to Figure 2 and Figure 5. (A) CRISPR/Cas9 technology was employed to delete the *NC116* homolog from mouse genome using guide RNAs flanking the sORF. Genotyping primers to detect the deletion are shown in the schematic overview, and a gel image is provided to show example PCR results. (B) Western blot analysis on mouse tissue panels revealed a prominent 10 kDa band enriched in muscle and heart tissues that was not present in *NC116*-MP knockout mouse tissues. Non-specific bands and Ponceau Red serve as loading controls.**

**Figure S2**

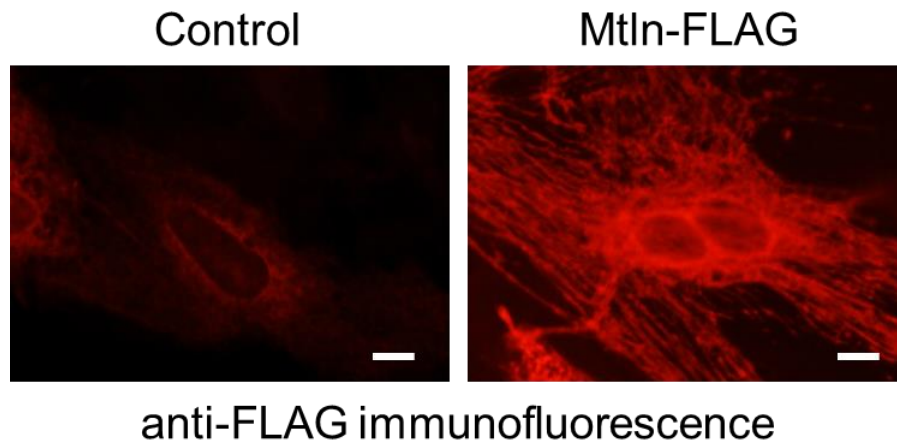

**Figure S2. Intracellular localization of FLAG-tagged Mtn proteins. Related to Figure 2.** C-terminal FLAG-tagged Mtn expression plasmids were transfected into cultured neonatal cardiomyocytes and immunocytochemistry was performed using an anti-FLAG antibody. Mtn-FLAG staining shows patterning consistent with mitochondrial localization; non-transfected cells serve as control. Scale bar = 10  $\mu$ m.



**Figure S3**

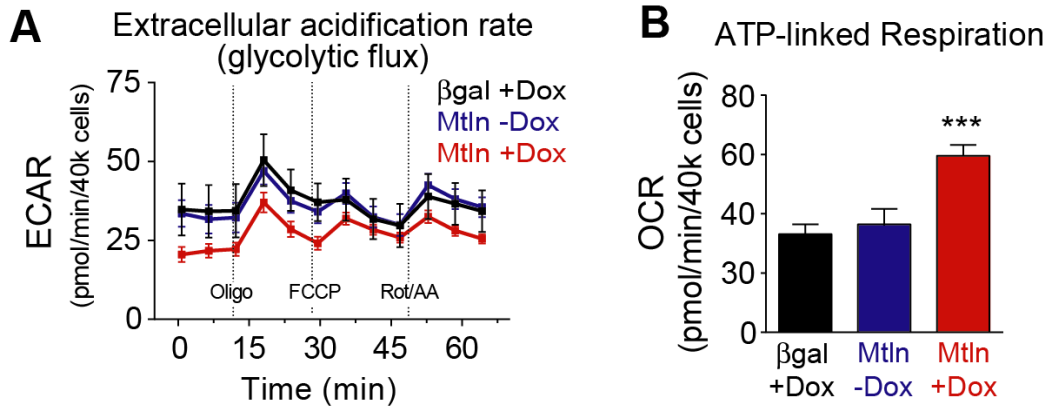

**Figure S3. Metabolic phenotyping data from HeLa cells overexpressing Mtn. Related to Figure 3.** Doxycycline (DOX)-inducible expression vectors were used to overexpress Mtn and beta-galactosidase ( $\beta$ gal, control) in cultured human HeLa cells, and 48 h later, Seahorse assays were performed in treated cells, measuring oxygen consumption (see **Figure 3C**) and extracellular acidification rates (**A**). (**B**) For oxygen consumption studies, ATP-linked respiration was calculated and plotted. Graphs are plotted as mean  $\pm$  SEM ( $n=12$ ) is indicated within each bar, and p-values were determined by one-way ANOVA with Dunnett's post-hoc, comparing to  $\beta$ gal+Dox; \*\*\* $p<0.001$ .

Figure S4

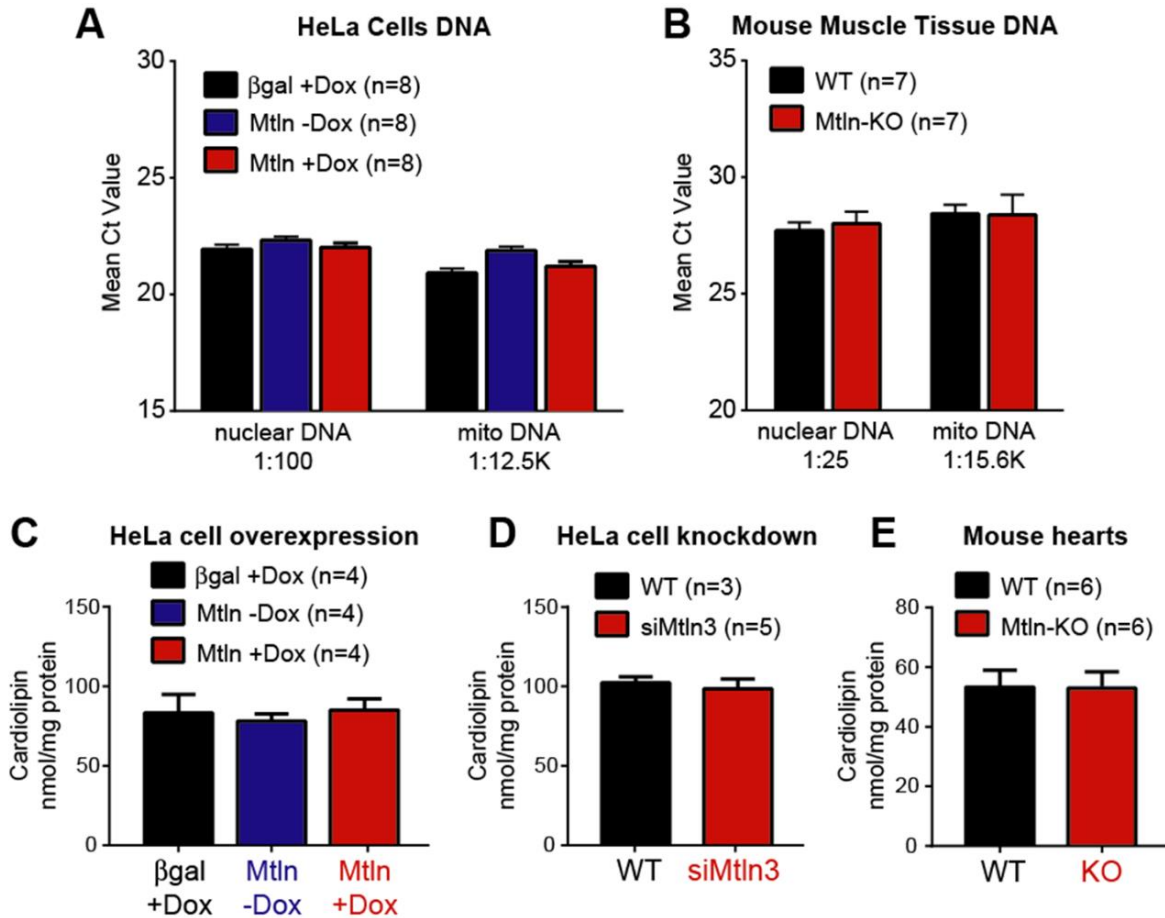

**Figure S4. Mitochondrial DNA and cardiolipin content in MtlN-overexpressing HeLa cells and MtlN-KO mouse muscle tissues. Related to Figures 2-5.** (A) Doxycycline (DOX)-inducible expression vectors were used to overexpress MtlN and beta-galactosidase (βgal, control) in cultured human HeLa cells, and 48 h later, DNA was extracted and mitochondrial and nuclear genomes quantified using QPCR (DNA dilutions indicated). (B) *In vivo* assessment of mitochondrial and nuclear DNA levels was also performed using mouse skeletal muscle DNA samples. (C-E) Cardiolipin levels were measured in Dox-inducible MtlN overexpression HeLa cells (C), in HeLa cells with siRNA-mediated MtlN knockdown (D), and in wild-type (WT) and MtlN-KO mouse hearts (E). Graphs are plotted as mean Ct +/-SEM (sample *n* is indicated). One-way ANOVA with Dunnett's post-hoc, comparing to βgal+Dox (overexpression studies), and two-tailed t-tests (WT vs. knockdown or KO) revealed no significant differences in mitochondrial DNA levels (with or without normalization to nuclear DNA; latter not shown) nor cardiolipin levels in MtlN-overexpressing cells or MtlN-KO tissues.

**Figure S5**

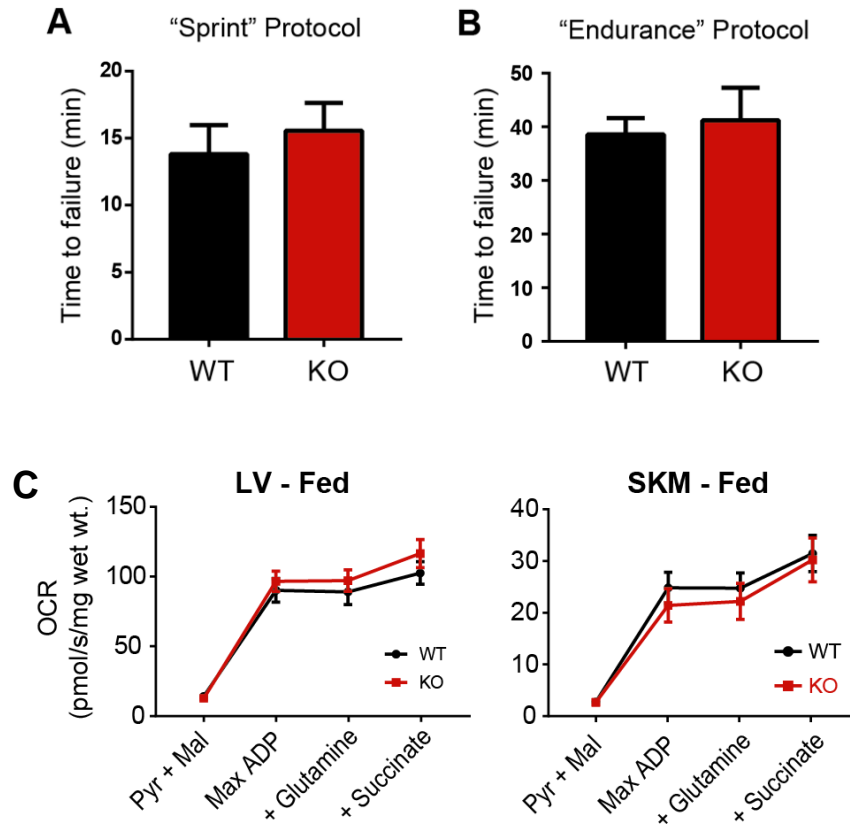

**Figure S5. Exercise tolerance testing and myofiber respiration measures in wild-type and Mtn-KO mice. Related to Figure 5.** Mice were subjected to exercise tolerance testing using either “sprint” (A) or gradual accelerated “endurance” (B) paradigms (see STAR Methods). Time to failure (i.e. no longer able to remain running on the treadmill) is plotted as mean  $\pm$  SEM;  $n=10$  per genotype (5 males and 5 females for each). No significant genotype-based differences were observed; two-tailed student’s t-test. (C) Permeabilized muscle fibers [cardiac, left ventricular (LV) and skeletal muscle (SKM), gastrocnemius] were harvested from fed wild-type (WT) or Mtn-KO mice, and oxygen consumption rates (OCR) were measured during sequential addition of pyruvate + malate (Pyr + Mal), 1 mM ADP (Max ADP), glutamine, and succinate; data are plotted as mean  $\pm$  SEM. Fed: WT  $n=7$  (4 males, 3 females), KO  $n=7$  (3 males, 4 females); Fasted:  $n=4$  females for both WT and KO.

Figure S6

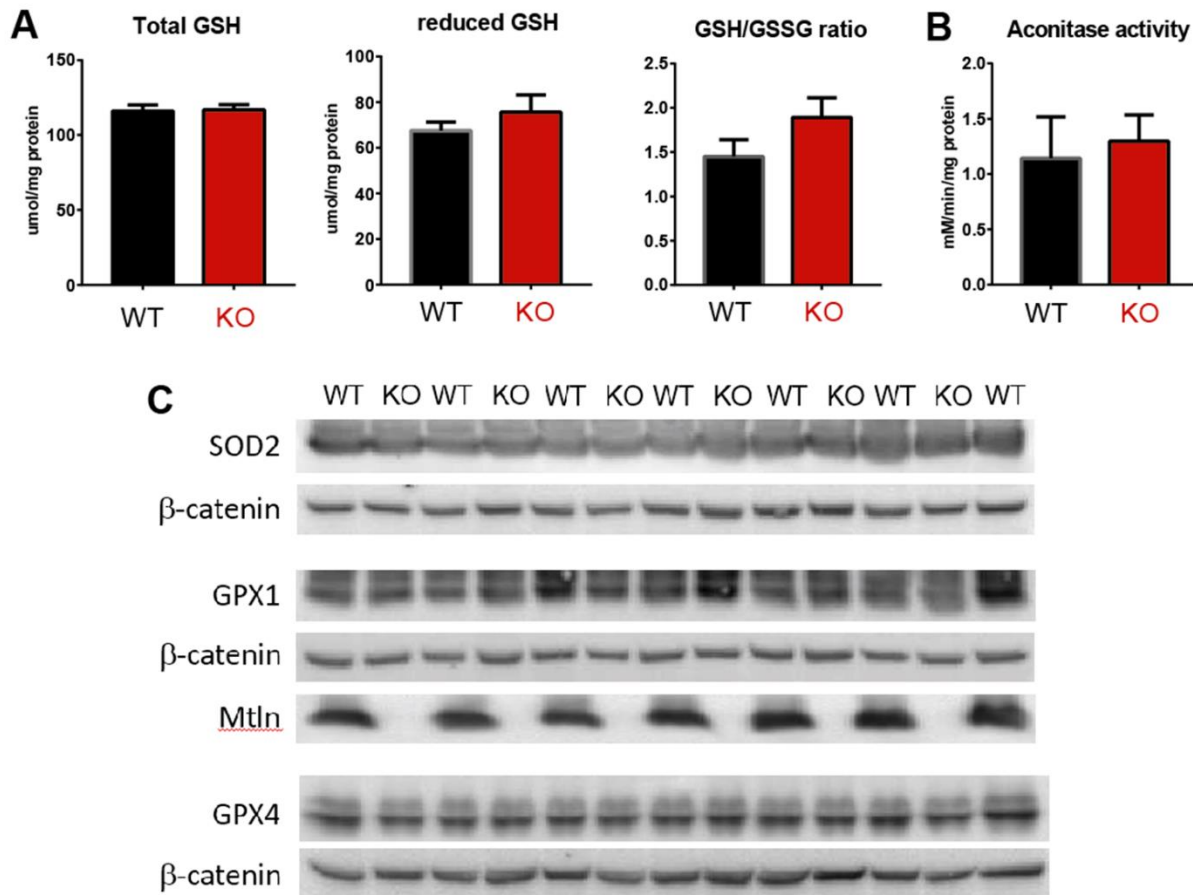

**Figure S6. Evaluation of oxidative stress readouts in wild-type and MtlN-KO mouse muscle tissues. Related to Figure 5.** (A) Levels of glutathione, both reduced (GSH) and oxidized (GSSG) forms, were measured in WT and KO mouse skeletal muscle tissue lysates. (B) Mitochondrial aconitase activity, which is known to be strongly suppressed by mitochondrial ROS, was measured in isolated mitochondria from WT and KO mouse hearts. Graphs are plotted as mean Ct +/-SEM (n=4 for each bar) Two-tailed t-tests revealed no significant differences between WT and MtlN-KO tissues. (C) Levels of key mitochondrial antioxidant enzymes (SOD2, GPX1 and GPX4) were measured in WT and KO cardiac tissues lysates, as an alternative readout for oxidative stress in the mice. No genotype-based differences were observed.

**Figure S7**

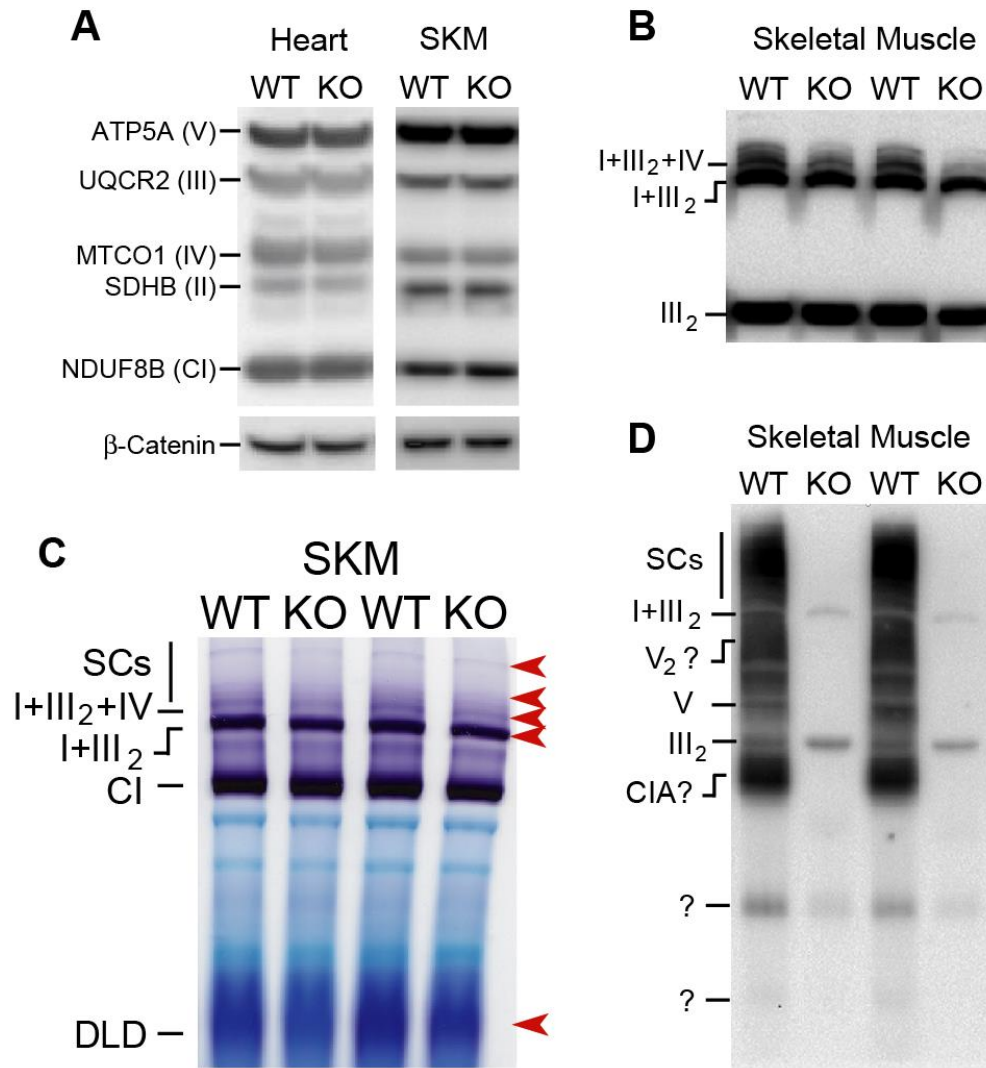

**Figure S7. Respiratory chain complex levels and Mtn distribution in wild-type and Mtn-KO mouse heart and skeletal muscle tissues. Related to Figure 5.** (A) Representative OXPHOS cocktail western blot performed on heart and skeletal muscle (SKM) tissues; n=4 per genotype were run, but no consistent genotype-based differences were observed. (B) Representative BN-PAGE and western blot for a Complex III subunit performed on SKM tissues. These data corroborate the reduced supercomplex formation observed in SKM by in-gel activity assay (panel C). (C) In-gel Complex I (CI) activity assay was performed on SKM tissue lysates from fed wild-type female mice (n=3/genotype, representative gels shown). Red arrows denote bands with decreased CI activity in KO mice. Upper red arrow points to a doublet band in WT hearts, with the top band virtually absent in KO mice. (D) Representative BN-PAGE western blot on SKM lysates shows co-migration of Mtn with various prominent mitochondrial complexes; see Figure 5D for cardiac tissue data.

Figure S8

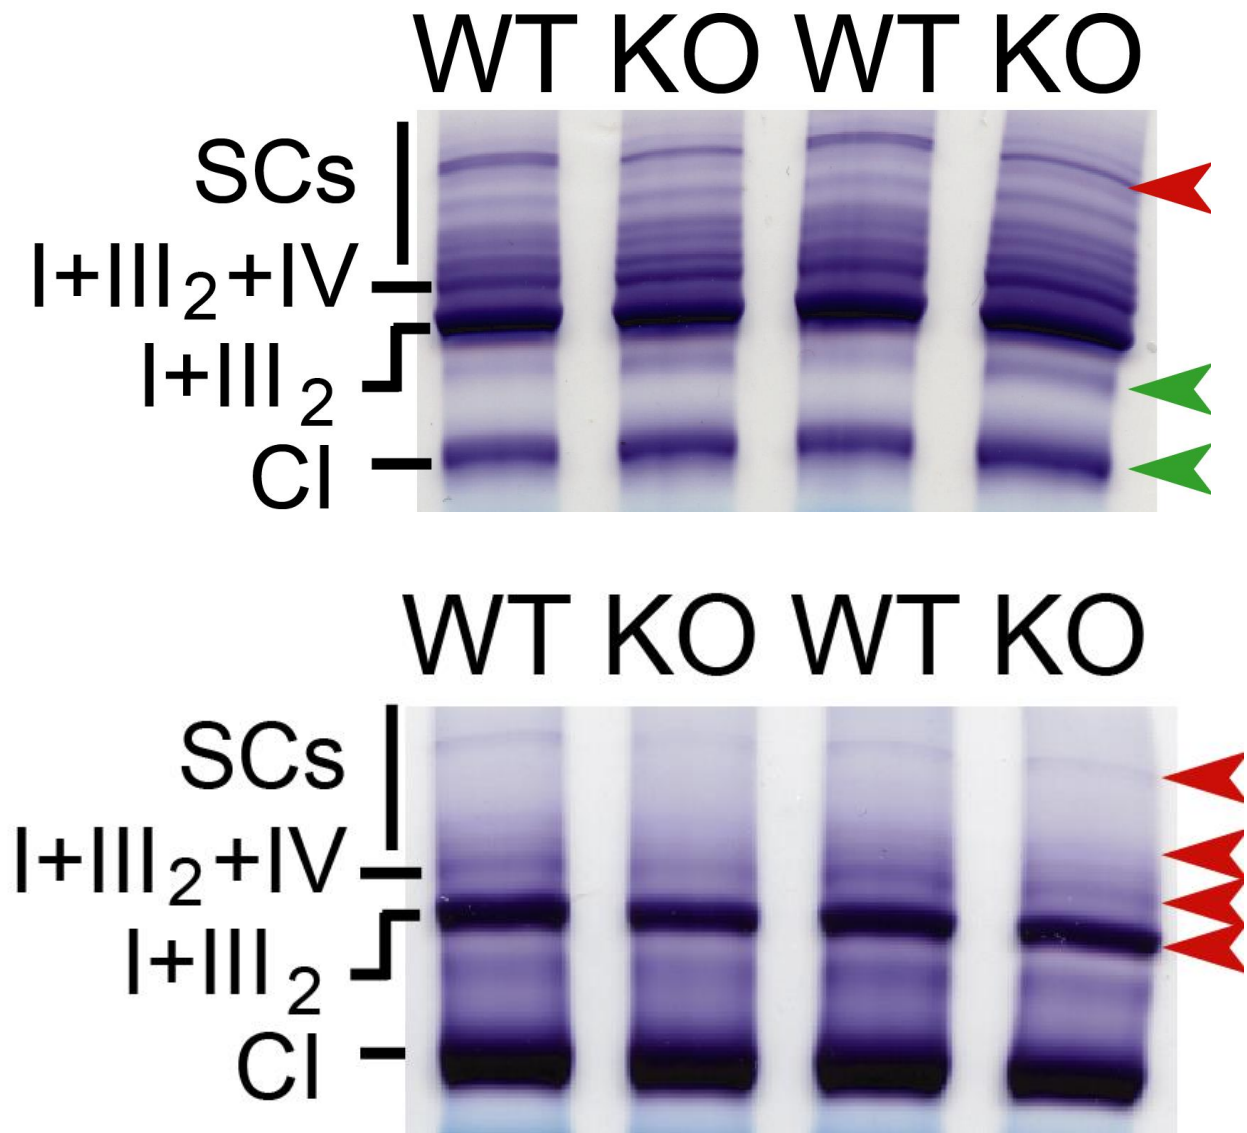

**Figure S8. Complex I in-gel activity assay on wild-type and MtlN-KO muscle tissues. Related to Figure 5.** Higher-power images corresponding to the Complex I (CI) in-gel activity assay presented in [Figure 5C](#) (heart, top) and [Figure S7C](#) (SKM, bottom) are provided to allow better visualization of the bands that show changes in MtlN-KO versus wild-type mice. Red and green arrows denote bands with decreased or increased (respectively) CI activity in KO mice. Upper red arrow points to a clear doublet band in WT hearts, with the top band being virtually absent in KO mice.

**Figure S9**

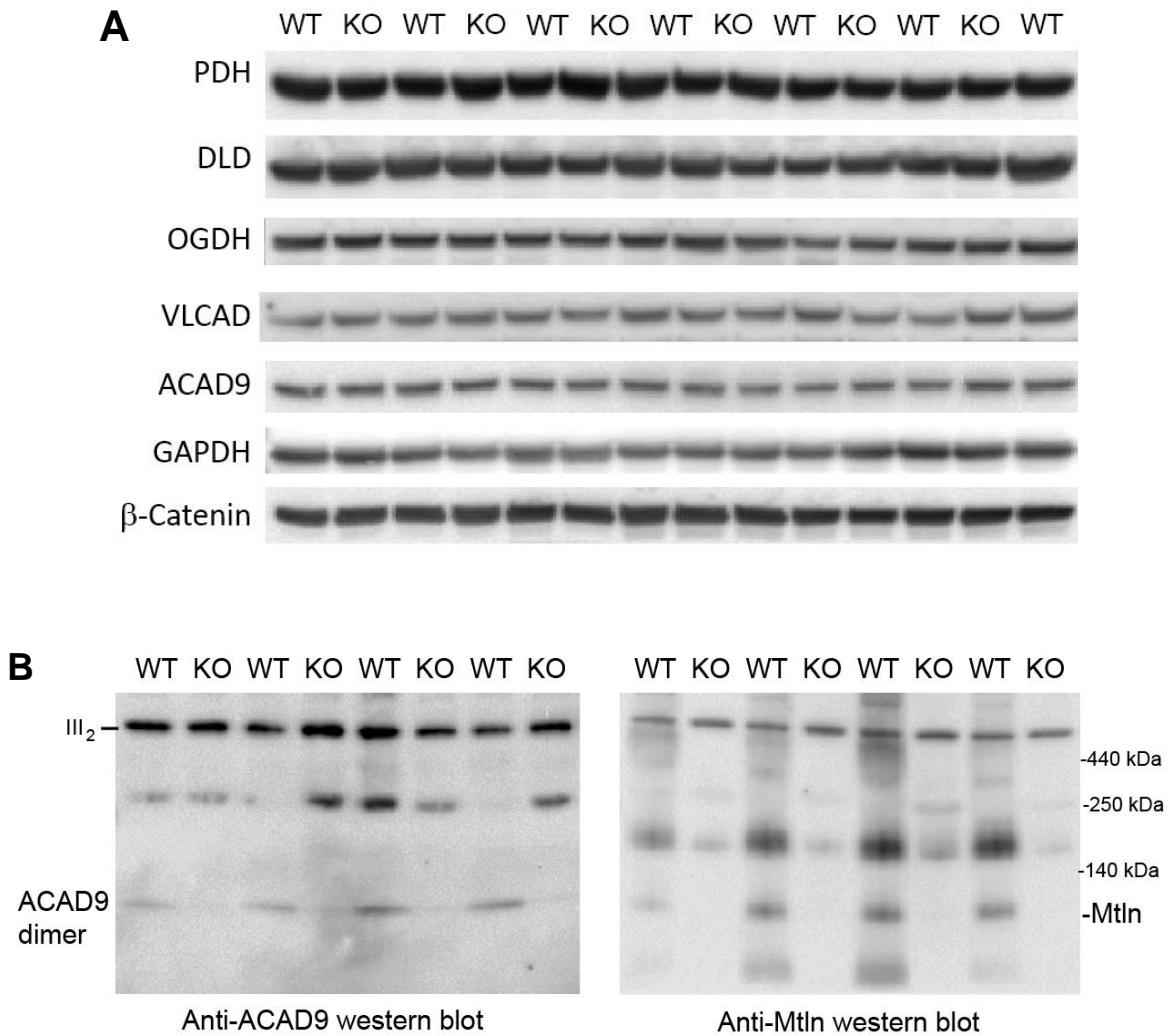

**Figure S9. Expression of TCA and FAO pathway enzymes in wild-type and MtlN-KO mouse hearts. Related to Figure 5. (A)** Western blot analyses performed on whole-tissue lysates from mouse hearts for the indicated proteins, which all appear to be expressed at similar levels in WT and KO mice. **(B)** BN-PAGE western blots for ACAD9 and MtlN in isolated mitochondrial show apparent loss of ACAD9 dimers in MtlN-KO mice; the dimers appear to co-migrate with MtlN containing complexes. Note: the anti-rabbit secondary antibody cross-reacts with a complex III subunit.
